1 **Delayed differentiation of vaginal and uterine microbiomes in**  
2 **dairy cows developing postpartum endometritis**

3  
4 Raúl Miranda-CasoLuengo<sup>1¶\*</sup>, Junnan Lu<sup>1¶,#a</sup>, Erin J. Williams<sup>2¶,#b\*</sup>, Aleksandra A. Miranda-  
5 CasoLuengo<sup>1,#c</sup>, Stephen D. Carrington<sup>2</sup>, Alexander C.O. Evans<sup>3</sup>, Wim G. Meijer<sup>1</sup>

6  
7  
8  
9 <sup>1</sup> UCD School of Biomolecular and Biomedical Science and UCD Conway Institute, University  
10 College Dublin, Dublin 4, Ireland.

11 <sup>2</sup> Veterinary Sciences Centre, UCD School of Veterinary Medicine, University College Dublin,  
12 Dublin 4, Ireland.

13 <sup>3</sup> UCD School of Agriculture and Food Science, University College Dublin, Dublin 4, Ireland.

14  
15  
16  
17  
18 #a Current Address: Pediatrics-Infectious Diseases, Medical School, University of Michigan, Ann  
19 Arbor, MI, USA.

20 #b Current Address: The Roslin Institute and Royal (Dick) School of Veterinary Studies, University  
21 of Edinburgh, Easter Bush Campus, Midlothian, Scotland, EH25 9RG.

22 #c Current Address: Moyne Institute of Preventive Medicine, Department of Microbiology,  
23 Trinity College Dublin, Dublin 2, Ireland.

24  
25 \*Corresponding authors

26 E-mail: [miranda.raul@ucd.ie](mailto:miranda.raul@ucd.ie) (RMC) and [erin.williams@ed.ac.uk](mailto:erin.williams@ed.ac.uk) (EJW)

27 ¶These authors contributed equally to this work

28

29

## 30 Abstract

31 Bacterial infection of the uterus is a normal event after parturition. While the healthy cow  
32 achieves uterine clearance early postpartum, cows unable to control the infection within 21  
33 days after calving develop postpartum endometritis. Studies on the Microbial Ecology of the  
34 bovine reproductive tract have focused on either vaginal or uterine microbiomes. This is the  
35 first study that compares both microbiomes in the same animals. Terminal Restriction Fragment  
36 Length Polymorphism of the 16S rRNA gene showed that despite large differences associated to  
37 individuals, a shared community exist in vagina and uterus during the postpartum period. The  
38 largest changes associated with development of endometritis were observed at 7 days  
39 postpartum, a time when vaginal and uterine microbiomes were most similar. 16S rRNA  
40 Pyrosequencing of the vaginal microbiome at 7 days postpartum showed at least three  
41 different microbiome types that were associated with postpartum endometritis. All three  
42 microbiome types featured reduced bacterial diversity. Taken together, the above findings  
43 support a scenario where disruption of the compartmentalization of the reproductive tract  
44 during parturition results in the dispersal and mixing of the vaginal and uterine microbiomes,  
45 which subsequently are subject to differentiation. This microbial succession is likely associated  
46 to early clearance in the healthy cow. In contrast, loss of bacterial diversity and dominance of  
47 the microbiome by few bacterial taxa were related to a delayed succession in cows developing  
48 endometritis at 7 DPP.

49

## 50 Introduction

51 Uterine infection is a common event in the postpartum period in cattle [1]. Early postpartum  
52 endometrial inflammation has been shown to occur in response to infection and tissue damage,  
53 and as a pre-requisite for uterine clearance and involution in preparation for a future  
54 pregnancy [2,3]. Failure or delay in resolving infection has implications for the reproductive  
55 health and fertility of cows. Postpartum endometritis is clinically defined as a persistent uterine  
56 infection with purulent discharge beyond 21 days postpartum (DPP) and is a major cause of  
57 infertility and economic loss in the dairy industry worldwide [4]. A scoring system based on the  
58 characterization of vaginal mucus, which reflects the level of bacterial infection in the uterus,  
59 has been used as a diagnostic tool for postpartum endometritis [5].

60 Early studies to identify possible aetiological agent(s) of postpartum uterine infection were  
61 focused on the isolation of bacteria from diseased animals [5–8]. Although postpartum  
62 endometritis often results from non-specific infections [8], the most common pathogens  
63 associated with the uterus of endometritic animals are *Escherichia coli*, *Trueperella pyogenes*,  
64 *Prevotella melaninogenicus* and *Fusobacterium necrophorum* [5,9]. These bacteria are often  
65 associated in mixed infections of the uterus, with evidence pointing to a succession in which *E.*  
66 *coli* is most prevalent in metritic cows during the first week postpartum. Its presence then  
67 increases the subsequent risk of infection by *T. pyogenes* in postpartum weeks 2 and 3, which in  
68 turn has been associated with postpartum endometritis [9,10].

69 A deeper insight into the bovine uterine microbiome at the postpartum period was recently  
70 gained using cultivation-independent molecular techniques [11–18]. Temporal analysis showed  
71 the occurrence of a bacterial succession in the uterine microbiome, with changes in the

72 composition of cows with uterine disease reported from calving until late postpartum  
73 [12,15,17]. The vaginal microbiome has become the subject of analysis using culture-dependent  
74 and culture-independent approaches [19–24]. However, a missing piece in the microbiology of  
75 the postpartum period is the comparison of the vaginal and uterine microbiomes. This study  
76 addresses whether there are consistently distinct communities in these compartments of the  
77 reproductive tract and how they are affected by postpartum disease, specifically by postpartum  
78 endometritis. In addition, given the differential ability to clear postpartum uterine infection, we  
79 hypothesize that the disruption of the compartmentalization in the reproductive tract during  
80 parturition results in the mixing of vaginal and uterine microbiota and that differentiation of  
81 microbial communities between vagina and uterus will differ between healthy cows and cows  
82 developing postpartum endometritis.

## 83 Materials and Methods

### 84 Animals

85 Three Irish dairy farms participated in this study. Each farm was selected based on high animal welfare  
86 standards. From the three farms, 113 cows were recruited onto the study: 42 from Farm A, 37 from  
87 Farm B and 34 from Farm C. Sixteen cows were excluded from the study for the following reasons:  
88 caesarean operation (1), twin birth (4) uterine wash immediately after calving (1), died (5), sold (3) and  
89 dried off (2). A total of 97 cows were included in the study. All procedures were carried out under  
90 authorisation of the Irish Department of Health and Children in compliance with the Cruelty to Animals  
91 Act 1876 (as amended by EU directive 86/609/EC), and all experimental protocols were approved by the  
92 University College Dublin Animal Research Ethics Committee (AREC-P-10-53).

93

### 94 Vaginal mucus assessment and uterine health diagnosis

95 Uterine health was assessed by weekly vaginal mucus scoring [5]. The vulva was thoroughly cleaned by  
96 spraying a solution of Hibiscrub (BCM Ltd, UK) and subsequent drying with a paper towel (Wypall L35;  
97 Kimberley Clark, UK). A clean, lubricated, gloved-hand was then inserted through the vulva. In each  
98 cow, the lateral, dorsal and ventral walls of the vagina and the external cervical os were palpated, and  
99 the mucus contents of the vagina withdrawn manually for examination. The vaginal mucus was  
100 assessed for colour, proportion and volume of pus, and a character score assigned as follows: 0 = clear  
101 or translucent mucus; 1 = mucus containing flecks of white or off-white pus; 2 = < 50 ml exudate  
102 containing ≤ 50% white or off-white mucopurulent material; and 3 = > 50 ml exudate containing  
103 purulent material, usually white or yellow, but occasionally sanguineous. The vaginal mucus was also  
104 assessed by odour, and given a score 0 for normal odour or a score of 1 if a fetid odour was detected.  
105 Animals were assessed weekly from 7 to 21 DPP and again prior to first breeding (at 50 DPP). They were

106 diagnosed as healthy if the vaginal mucus character score was 0 or 1 and there was no fetid odour  
107 present at every time point. Animals were diagnosed as having postpartum endometritis if the vaginal  
108 mucus character score was 0 or 1 and there was no fetid odour present on Days 7 and 14 postpartum  
109 but then subsequently had purulent mucus i.e. character score of 2 or 3 with or without a fetid odour,  
110 on day 21 postpartum or prior to breeding [25].

111

## 112 Uterine and vaginal swab collection

113 A double-guarded instrument (Labstock, Co. Meath, Ireland) was used to collect uterine and vaginal  
114 swabs in duplicate from each cow. Uterine swabs were collected from the uterine body using a validated  
115 method [5,26]. Briefly, the vulva was thoroughly cleaned as described above. A double guarded  
116 instrument containing the swab was then inserted through the vagina and cervical canal into the lumen  
117 of the uterus, guided by palpation per rectum. Within the uterine body, the cotton swab was extruded  
118 from the double guard tube and brought into firm contact with the endometrium by gentle pressure per  
119 rectum, about 2cm from the bifurcation of the horns, before being withdrawn into the guard. Vaginal  
120 swabs were collected using a similar protocol. Briefly, the double guarded instrument was inserted into  
121 the vagina, the swab was extruded from the guard and rotated gently against the vaginal wall before  
122 being drawn back into the guard. Swab samples were collected before vaginal examination and mucus  
123 assessment to avoid the possibility of introducing bacterial contaminants into the vagina and/or  
124 disrupting the equilibrium of the reproductive tract prior to sample collection.

125 The tip of each swab was cut off and placed into a 1.5 ml polypropylene tube containing 300 µl  
126 of TE buffer (20 mM TrisHCl, pH 8.0, 2 mM sodium EDTA), snap-frozen in liquid Nitrogen and  
127 shipped in dry ice for molecular analysis.

128

## 129 DNA extraction

130 Swab samples were vortexed to disperse cells from the cotton tip and centrifugated for 8 min  
131 at 8000 x *g*. Metagenomic DNA was extracted using the Qiagen DNeasy Blood and Tissue kit  
132 following the manufacturer's instructions for Gram positive bacteria (Qiagen). Briefly, pellets  
133 were suspended by vortexing in 90 µl TET buffer (TE supplemented with 0.2% [v/v] TritonX-  
134 100). 90 µl of TET supplemented with 40 mg/ml egg white Lysozyme were added and incubated  
135 at 37°C for 2h. Proteinase K digestion of the sample was performed at 56°C for 1h. Samples  
136 were further incubated at 90°C for 5 min and after adding AL buffer, they were loaded in the  
137 Qiagen column. Elution was performed in 50 µl of AE buffer. Extracted DNA was stored at -80°C  
138 until further use.

139

## 140 Terminal-Restriction Fragment Length Polymorphism.

141 Terminal-restriction fragment length polymorphism (T-RFLP) was used to obtain fingerprints of  
142 the microbial communities associated with vaginal and uterine DNA samples as previously  
143 described [27]. Briefly, amplicons of the 16S rRNA genes were obtained by nested PCR, first by  
144 15 amplification cycle with primers 27F-CM (5'-AGAGTTTGATCMTGGCTCAG) and 1492R (5'-  
145 TACGGYTACCTTGTTACGACTT) [28,29], followed by a second amplification of a ~1kb  
146 fluorescently-labelled product using primers 6FAM-27F-CM and U1052R (5'-  
147 GARCTGRCGRCRRCCATGCA) [30]. *MspI* digested products were ethanol precipitated,  
148 resuspended in Hi-Di Formamide (final concentration 50 ng/µl) containing GeneScan-500 LIZ

149 Size Standard (Applied Biosystems) and separated by capillary electrophoresis using a 3130x/  
150 capillary array (36 cm) in an ABI 3130x/ Genetic Analyzer (Applied Biosystems).

151

## 152 Pyrosequencing

153 A fragment of ~507 bp covering V1-V3 regions of the 16S rRNA gene (*E. coli* position 27 to 534)  
154 was selected as target for pyrosequencing. Libraries for pyrosequencing were obtained by  
155 nested PCR. In a first step, ~1.5 kb amplicons (10  $\mu$ L) were produced from each DNA sample  
156 with primers 27F-CM and 1492R using the Phusion HF DNA polymerase (New England Biolabs).  
157 Then, 1  $\mu$ L of the resulting amplicon was used as template for the nested PCR (20  $\mu$ L) using  
158 primers A-MID-27F  
159 (5'CCATCTCATCCCTGCGTGTCTCCGACTCAGNNNNNNNNNAGAGTTTGATCMTGGCTCAG) and B-  
160 534R (5'CCTATCCCCTGTGTGCCTTGGCAGTCTCAGATTACCGCGGCTGCTGG). Amplicons were  
161 barcoded by introducing a 10 bp multiplex identifier (MID) represented by Ns in the primer A-  
162 MID-27F. Underlined sequences at the 5' of the primers correspond to the pyrosequencing  
163 adapters A and B, respectively (454 Life Sciences). PCR reactions contained 1X Phusion HF  
164 buffer, 0.2 mM dNTPs, 0.5  $\mu$ M each of primer (27F-CM and 1492R), 3% DMSO and 0.2 units of  
165 Phusion HF DNA polymerase as recommended by the manufacturer (New England Biolabs). The  
166 amplification program consisted of an initial denaturation step at 98°C 30 sec, followed by  
167 either 15 or 27 cycles of 8 sec melting at 98°C; 20 sec of annealing at 65°C and 45 sec of  
168 extension at 72°C for the first and second PCR, respectively. A final extension was carried out  
169 for 5 minutes at 72°C. Duplicate PCR amplicons originated from the same sample were pooled  
170 and purified with the Agencourt AMPure XP PCR Purification system following the



171 manufacturer's instructions (Agencourt Bioscience Corporation, Beckman Coulter). The  
172 quantification of purified PCR amplicons was assessed in black 96-well plates on a Varioskan  
173 spectrofluorometer (Thermo Electron Corporation) using PicoGreen dsDNA Quantitation Kit  
174 (Invitrogen). Purified amplicons (1  $\mu$ L) were also visualized on 2% agarose gel. Equimolar  
175 amounts of amplicons obtained from different samples were pooled. Emulsion PCR and 454  
176 library generation were performed at the 454 Sequencing Centre (Branford, USA). Sequencing,  
177 starting from the A adapter end by using lib-L annealing beads, was performed on a Roche/454  
178 GS-FLX Titanium system at the 454 Sequencing Centre (Branford, USA).

179

## 180 Bioinformatics

181 T-RFLP fragment sizes were determined using GeneMapper v4.0 (Applied Biosystems). Merging  
182 of biological replicates and multiple alignment of T-RFLP profiles was performed with T-Align  
183 [31]. Only fragments present in both biological replicates and contributing at least 0.5% of the  
184 total fluorescence signal were included in the analysis. Terminal restriction fragments and Bray-  
185 Curtis resemblance matrix are provided as supporting information (Table S1). Heatmaps of  
186 relative abundance obtained from the fluorescent signal of terminal restriction fragments were  
187 made using the conditional formatting tool in Excel 2010. Cells were formatted depending on  
188 their value using a 3-colour scale where the midpoint was set as the 95 percentile. Data were  
189 analysed using Primer6 v6.1.13 and Permanova+ v1.0.3 [32]. Briefly, square root transformed  
190 relative abundances were used to obtain a resemblance matrix based on the S17 Bray-Curtis  
191 similarity. The above matrix was then used into downstream analysis including hierarchical  
192 cluster analysis and non-metric multidimensional scaling (nMDS). Group centroids were

193 determined from the above Bray-Curtis resemblance matrix and used to generate a new  
194 resemblance matrix of distances between groups. A network focusing on the high frequency  
195 OTUs detected in both vagina and uterus was generated with QIIME 1.8 and implemented in  
196 Cytoscape 3.2.0.

197 Pyrosequencing data was analysed with the Quantitative Insights Into Microbial Ecology (QIIME  
198 1.8) [33]. Multiplexed sequences were assigned to samples based on their unique nucleotide  
199 barcode while any low quality or ambiguous reads were removed. In order to reduce the  
200 amount of erroneous Operational Taxonomic Units (OTUs), denoising of the dataset was  
201 performed using `denoise_wrapper.py` [34] in two hi1.4x large instances in EC2 Amazon Web  
202 Services. Chimeras were detected with ChimeraSlayer [35] and removed from the dataset.  
203 Datasets were deposited into the Sequence Read Archive (SRA) under accession numbers  
204 SRX3849466 and SRX3849984. *De novo* picking of OTUs, at 97% of sequence identity, was  
205 carried out with `uclust` [36]. Representative sequences were aligned to the best matching  
206 sequence in the Greengenes 13\_8 core reference alignment using the PyNAST method [37].  
207 Taxonomic affiliations were assigned with `uclust` and a phylogenetic tree constructed using  
208 `FastTree` [38]. Jackknifed-supported UPGMA trees of samples was constructed from rarefied  
209 OTU tables using UniFrac distances [39].

210

## 211 Results

### 212 Incidence of postpartum endometritis

213 In total, 26 out of 97 animals were diagnosed as healthy (26.8%) and 24 were diagnosed with  
214 postpartum endometritis (24.7%). The remaining 47 (48.5%) animals presented with metritis;  
215 short term, acute uterine disease characterised by the presence of purulent vaginal mucus on 7  
216 and/or 14 DPP but that had resolved by 21 DPP. Given that the focus of the present work was  
217 on comparing the microbiomes of healthy cows and cows that developed postpartum  
218 endometritis, animals diagnosed with metritis were not further included. Samples that failed to  
219 produce PCR products or whose replicates produced highly variable TRFLP profiles were also  
220 excluded. Table 1 shows the number of samples remaining for healthy and endometritic cows  
221 at different times postpartum.

**Table 1. Summary of vaginal and uterine sampling and clinical assignments\***

| Days postpartum | Healthy |        | Endometritic |        |
|-----------------|---------|--------|--------------|--------|
|                 | Vagina  | Uterus | Vagina       | Uterus |
| Precalving**    | 18      | -      | 16           | -      |
| 7               | 21      | 14     | 15           | 12     |
| 21              | 11      | 14     | 15           | 11     |
| 50              | 9       | 12     | 12           | 11     |

\* Vaginal and uterine swab samples were taken in duplicate on 7, 21 and 50 DPP.

\*\* Precalving samples were only taken from the vagina at -7 DPP.

222

### 223 Comparison of vaginal and uterine microbiomes in the reproductive 224 tract of healthy cows postpartum.

225 With the aim of comparing vaginal and uterine microbiomes, duplicate vaginal and uterine  
226 swabs were collected from dairy cows on days 7, 21 and 50 postpartum (Table 1) and analysed

227 by T-RFLP of the 16S rRNA gene. Overall, 311 OTUs were observed (Fig 1A) at different  
228 frequencies among the sampled animals (Fig 1B). Approximately 50% of the OTUs were  
229 observed in 5% or less of the cows, showing an important degree of variation among  
230 individuals. OTUs of medium representation, shared by 7 to 23% of the cows, constituted about  
231 40% of the microbiome. The remaining 10% of the OTUs were detected in 23 to 68% of the  
232 animals. Vaginal and uterine samples produced similar T-RFLP profiles (Fig 1A), OTU  
233 distributions (Fig 1B) and shared highly represented OTUs, as visualised in an OTU network (Fig  
234 1C). Unsurprisingly, ordination of samples by non-metric multidimensional scaling (nMDS) failed  
235 to form clusters by site of sampling (Fig 1D). In addition, the data failed to show a significant  
236 temporal variation in the microbial communities at different times postpartum (Permanova  $P =$   
237 0.087). Taken together, these results indicate that although there is a high degree of variation  
238 among individuals, a core microbiome exists in the postpartum reproductive tract, not only  
239 among different animals but also between the vaginal and uterine microbiomes as no  
240 significant differences were detected (Permanova  $P = 0.38$ ).

241

242 **Figure 1. T-RFLP-based comparison of the vaginal and uterine microbiomes of healthy cows**  
243 **postpartum.** PCR amplicons of the 16S rRNA were obtained from DNA samples using primers 6-  
244 FAM-labeled 27F and 1052R and digested with *MspI* restriction enzyme. Fluorescently labeled  
245 terminal restriction fragments (TRFs) were resolved in an ABI 3730xl genetic analyzer (Applied  
246 Biosystems). GeneScan Liz 600 size standard was used for fragment sizing using GeneMapper  
247 v4.0 (Applied Biosystems). Operational Taxonomic Units (OTUs) were assigned in T-Align from  
248 TRFs representing at least 0.5% of the total signal and consistently found in duplicated samples.  
249 **A)** Heat map representing community profiles obtained from postpartum vaginal and uterine  
250 samples. The profile of each sample (rows) is populated by OTUs of varying lengths (columns).  
251 The relative abundance of the OTUs in a given profile is indicated by the colour key on the top  
252 where black and red represent the lowest and highest values and the midpoint (yellow) was set  
253 as the 95 percentile. The heat map was produced in Excel 2010 using the conditional  
254 formatting function and subsequently imported as image into CorelDraw X4. **B)** Distribution of  
255 OTUs in the reproductive tract of healthy cows postpartum. Black, vagina; Red, uterus. The

256 regions marked on top show the contribution of OTUs to the total number of observed OTUS. i,  
257 50%; m, 40%; s, 10%. **C)** Network showing high frequency OTUs (green circles) present in both  
258 vaginal (black triangles) and uterine (red circles) samples. OTUs and samples are connected  
259 through edges. The size of the green circles represents the OTU frequency among sampled  
260 animals. Samples with higher number of connections are displayed closer to the OTUs. **D)**  
261 Ordination of samples by non-metric multidimensional scaling (nMDS) based on the Bray-Curtis  
262 resemblance of the samples. Vaginal and uterine samples are represented by black triangles  
263 and red circles, respectively.  
264

## 265 Community changes associated with postpartum endometritis.

266 This study hypothesises that the microbiome of the bovine reproductive tract is related to the  
267 reproductive health status of the animal and that changes in microbial community structure  
268 would be especially relevant in animals affected by postpartum endometritis. Comparison of T-  
269 RFLP datasets showed that the microbiome of the reproductive tract of cows that subsequently  
270 developed postpartum endometritis is significantly different to that of healthy cows  
271 (Permanova  $P = 0.001$ ) and that the microbial populations change over time (Permanova  $P =$   
272  $0.014$ ). Furthermore, a change in community structure on 7 DPP is associated with the  
273 subsequent development of endometritis (Fig 2). The community change included both a  
274 decline in OTUs that were otherwise highly represented in healthy animals, as well as the  
275 appearance of a sub-community associated with postpartum endometritis that is observed in  
276 both vagina and uterus (Fig 2A and 2B). Hierarchical cluster analysis of group centroids  
277 separated the sample groups into two major clusters. Cluster 1 (Branch 1 in Fig 2C) contains  
278 both vaginal and uterine populations from cows developing postpartum endometritis at 7 DPP  
279 (V7E and U7E). Cluster 2 is formed by two branches (Branches 2a and 2b in Fig 2C). Branch 2a  
280 contains healthy cows at 7 DPP (V7C and U7C), uterine microbiomes of healthy cows at 21 DPP  
281 (U21C) and both vaginal and uterine microbiomes of endometritic cows at 21 and 50 DPP

282 (V21E, U21E, V50E and U50E). Branch 2b contains the precalving groups (VPcC and VPcE), the  
283 group of vaginal microbiomes from healthy animals at 21 DPP (V21C), and both vaginal and  
284 uterine microbiomes at 50 DPP (V50C and U50C). Recovery of the community structure in cows  
285 that developed postpartum endometritis was evident at 21 DPP and continued at 50 DPP (Fig  
286 2). Highly represented OTUs in healthy animals that were lost at 7 DPP in animals developing  
287 postpartum endometritis, started to reappear while endometritis-associated OTUs decreased  
288 (Fig 2A and Fig 2B). These results suggest a succession in the microbial communities as a  
289 consequence of the disturbance in the reproductive tract during calving. In addition, they show  
290 that the disturbance in healthy animals is lower, which may be associated with a faster  
291 clearance than in cows developing postpartum endometritis.

292

293 **Figure 2. Temporal analysis of the microbiome associated with the reproductive tract of cows**  
294 **pre- and postpartum. A)** T-RFLP-based analysis of the vaginal (triangles at the right of the  
295 heatmaps) and uterine (circles) microbiomes of healthy (empty symbols) and endometritic  
296 (solid symbols) cows pre-calving (Pc) and at different times postpartum (7, 21 and 50 DPP). The  
297 profile of each sample (rows) is populated by OTUs of varying lengths (columns). Arrowheads at  
298 the top of the heatmap indicate some of the changes associated with animals developing  
299 postpartum endometritis. Black arrowheads, loss of highly represented OTUs; Red arrowheads,  
300 appearance of OTUs. The relative abundance of the OTUs in a given profile is indicated by the  
301 colour key at the top right corner. Amplicons of the 16S rRNA were obtained from DNA samples  
302 by nested PCR and as described in Materials and Methods section. Fluorescently labeled  
303 terminal restriction fragments (TRFs) were resolved in an ABI 3730xl genetic analyzer.  
304 GeneScan Liz 600 size standard was used for fragment sizing using GeneMapper v4.0. OTUs  
305 were assigned in T-Align from TRFs representing at least 0.5% of the total signal and  
306 consistently found in duplicated samples. The heat maps were produced in Excel 2010 using the  
307 conditional formatting function. **B)** Differential OTUs in the reproductive tract of dairy cows  
308 postpartum. The  $dE_t$  value accounts for the difference in frequency of a given OTU between  
309 endometritic and healthy cows ( $dE_t = f_e - f_h$ ) at a given time postpartum (denoted by  $t$ ). Thus,  
310 the frequency of OTUs with positive values of  $dE$  is increased in endometritic animals while  
311 negative values show increased frequency in healthy cows at a given time postpartum. Left to  
312 right plots respectively correspond to 7, 21 and 50 DPP in vagina (Black plots) and uterus (Red  
313 plots). **C)** Complete linkage hierarchical cluster analysis (Top panel) and non-metric  
314 multidimensional scaling (Bottom panel) of groups. Distances are based on Bray-Curtis

315 dissimilarity of group centroids. Each group is identified using the same symbols showed at the  
316 right of the heat maps in A. The analysis was performed in PRIMER6 and PERMANOVA+ with  
317 group centroids obtained from a resemblance matrix generated from square root transformed  
318 T-RFLP data. Figures were re-drawn using CorelDraw X4.  
319

## 320 Vaginal and uterine microbiomes are most similar in cows developing 321 postpartum endometritis at 7 DPP.

322 So far, we have shown that the most important changes in the community structure of the  
323 reproductive tract microbiome happen at 7 DPP (Fig 2), that there is a strong component of the  
324 microbiome associated with individual-specific OTUs (Fig 1B) and that vaginal and uterine share  
325 a core microbiome in healthy animals (Fig 1C and 1D). Regression analysis of shared OTUs in  
326 paired samples of vagina and uterus at 7 DPP provided evidence that the observed similarity is  
327 based not only on the presence of shared OTUs but also on their relative abundances (Fig 3A  
328 and 3B). The probability of detecting OTUs in a given microbiome due to neutral processes,  
329 such as bacterial dispersion, is proportional to the abundance of the same OTU in a source  
330 microbiome [40]. The results presented in Fig 3C and 3D show that the higher the relative  
331 abundance of shared OTUs in the vagina, the higher their frequency of detection in uterus. This  
332 is consistent with the occurrence of a neutral process that results from the homogenization of  
333 the vaginal and uterine microbiomes due to the disruption of the compartmentalization of the  
334 reproductive tract during parturition. In addition, higher coefficients of determination were  
335 observed in cows developing postpartum endometritis as compared with cows that achieved  
336 clearance suggesting a delayed differentiation of the vaginal and uterine microbiomes in the  
337 former group.

338

339 **Figure 3. Disruption of the compartmentalization in the reproductive tract during parturition**  
340 **results in homogenization of vaginal and uterine microbiomes. A and B)** Scatter plots of the  
341 abundance of OTUs observed in both vagina and uterus of dairy cows at 7 DPP. OTUs from each  
342 cow are displayed in different colour. The line of best fit (solid line) was obtained by least  
343 squares regression. The coefficient of determination shows the goodness of fit. The dotted line  
344 indicates the expected line assuming perfect correlation. **C and D)** Frequency of OTU detection  
345 in the uterus of dairy cows at 7 DPP as a function of their relative abundance in vagina. The  
346 relative abundance of a given OTU in the community of vagina was calculated as the average  
347 fluorescence signal associated to the OTU in the vagina of sampled animals. The observed  
348 frequency of detection for each OTU in uterus was calculated as number of cows in which the  
349 OTU was detected / total number of cows. Data was fitted to a 3-parameter sigmoid using the  
350 dynamic fit wizard of SigmaPlot 13. The higher the coefficient of determination the best the  
351 overall best-fit solution. **A and C)** Healthy cows; **B and D)** Cows developing postpartum  
352 endometritis.

353

354 In agreement with the above results, comparison of the similarity between paired vaginal and  
355 uterine microbiomes showed that, at 7 DPP, the vaginal and uterine microbiomes of cows  
356 developing postpartum endometritis are more similar than in animals that cleared the transient  
357 infection postpartum ( $61.9 \pm 15.0\%$  vs  $25.7 \pm 12.7\%$ ,  $P < 0.001$ ) (Fig 4A). Differentiation between  
358 vaginal and uterine communities was evident from a decreased similarity in paired samples  
359 over time ( $38.9 \pm 22.1\%$  at 21 DPP and  $27.8 \pm 13.1\%$  at 50 DPP) (Fig 4B-4D). Taken together,  
360 these results suggest that both differences among individuals and the presence of shared OTUs  
361 in vagina and uterus mask differences in the composition of vaginal and uterine microbiomes  
362 that only become evident when comparing paired samples. In addition, they also suggest that  
363 the microbial succession in animals developing postpartum endometritis is delayed as  
364 compared with animals capable of clearing the infection postpartum, whose vaginal and uterine  
365 microbiomes differentiated as early as 7 DPP.

366



367 **Figure 4. Differentiation of the vaginal and uterine microbiomes. A-C)** Non-metric  
368 multidimensional scaling of vaginal (squares) and uterine (circles) samples collected at **A) 7, B)**  
369 **21 and C) 50 days postpartum** from animals that cleared the transient infection (black symbols)  
370 or that developed postpartum endometritis (red symbols). Vaginal and uterine samples  
371 originating from the same animal are linked. The colour of the link represents the Bray-Curtis  
372 similarity between the microbiomes associated with each compartment of the reproductive  
373 tract. Links between paired samples were added in CorelDraw X4. **D)** Average and standard  
374 deviation of the Bray-Curtis similarities of paired vaginal and uterine samples at 7, 21 and 50  
375 days postpartum from healthy (black bars) and endometritic cows (red bars). Asterisks above  
376 the horizontal lines show the presence of significant differences between groups: \*,  $P < 0.05$ ;  
377 \*\*,  $P < 0.001$ .  
378

379 The above results prompted the question whether the prepartum vaginal communities in dairy  
380 cows could differentiate between healthy animals and those that will develop endometritis.  
381 Comparison of T-RFLP datasets obtained from 35 cows indicated that the vaginal microbial  
382 community of the pre-calving cow is not related to postpartum uterine health (Permanova  $P =$   
383  $0.7655$ ) (Fig S1).

384

385 **Pyrosequencing of the vaginal microbiome of cows at 7 days**  
386 **postpartum.**

387 So far, the largest differences in the microbiomes of healthy cows and cows developing  
388 postpartum endometritis were observed at 7 DPP. Interestingly, those differences are  
389 contained in the vaginal microbiome. Thus, we decided to further analyse the vaginal  
390 microbiome of 30 cows, 20 healthy and 10 developing postpartum endometritis, by  
391 pyrosequencing an amplicon containing the variable regions v1 to v3 of the 16S rRNA. A dataset  
392 of 701189 high-quality, non-chimeric, sequences was obtained with an average of  $23373 \pm 6898$   
393 sequences per animal. A representative set was generated by clustering sequences in (OTUs) at

394 97% of identity. In total, 8504 non-chimeric OTUs were found with an average  $933 \pm 614$  per  
395 sample. Table S2 shows a summary of the metrics for each sample. The Chao1 metric estimated  
396 that the average number of species was  $1410 \pm 860$  per sample. The current sequencing effort  
397 was sufficient to cover  $95.47 \pm 3.56\%$  of the species as determined by Good's estimator of  
398 coverage. The diversity was observed in the range of  $H'$  0.61 to 6.29 with an average of  $H'$   $3.82$   
399  $\pm 1.75$  and the evenness ranging from  $J'$  0.1 to 0.84 (Table S2). In agreement with the T-RFLP  
400 data, the wide range in the values of these metrics show an important difference in the  
401 communities associated with individual samples.

402 A total of 7576 out of 8504 OTUs had representative sequences in the Greengenes 13\_8  
403 database and were distributed into 21 phyla, 52 classes, 90 orders, 174 families and 379  
404 genera. Overall, the six most abundant phyla were Firmicutes (64%), Bacteroidetes (27.7%),  
405 Fusobacteria (2.9%), Proteobacteria (1.8%), Tenericutes (1.3%) and Actinobacteria (1.1%). The  
406 remaining 928 OTUs were only assigned within the kingdom Bacteria. In spite of accounting for  
407 a large percentage of the OTUs, their contribution to the total abundance was relatively minor  
408 as only 4683 sequences (ie. 0.67% of the observations) were associated with these.

409

## 410 Dysbiosis in the vaginal microbiome of cows developing postpartum 411 endometritis.

412 In agreement with the results yielded by T-RFLP, pyrosequencing data showed distinct  
413 microbiomes at 7 DPP between healthy cows and in cows subsequently developing postpartum  
414 endometritis. Analysis of principal coordinates showed that 33% of the variation of the data

415 was explained by the first principal coordinate (PC1), which separated healthy from  
416 endometritic cows (Fig 5A). PC2, accounting for 17% of the variation, was most likely related to  
417 differences among individuals. These changed communities featured a significant reduction in  
418 the number of observed OTUs ( $P < 0.0001$ ), bacterial diversity ( $H'$ ,  $P < 0.0001$ ) and species  
419 evenness ( $J'$ ,  $P = 0.0003$ ) as compared to healthy animals (Fig 5B and Table S2). The collapse of  
420 bacterial diversity was evident in a rarefaction curve where the number of observed species in  
421 cows that developed postpartum endometritis approached the asymptote much faster than  
422 cows that cleared the postpartum infection (Fig 5C). The total number of estimated species by  
423 the Chao1 metric was  $649.6 \pm 322.14$  and  $1789.95 \pm 789.58$  for endometritic and healthy cows,  
424 respectively (Fig 5A and Table S2).

425

426 **Figure 5. Collapse of the vaginal microbiome in cows developing postpartum endometritis.**  
427 Differences in the vaginal microbiome of cows developing postpartum endometritis (red) and  
428 healthy cows (blue) were captured by 454 pyrosequencing of the v1-v3 16S rRNA at 7 days  
429 postpartum. OTUs at 97% of identity were generated in QIIME 1.8 using the  
430 pick\_de\_novo\_otus.py pipeline. **A)** Principal components analysis showing a clear separation of  
431 samples by health status. **B)** Box plot summary of the diversity metrics of the vaginal  
432 microbiome showing lower richness and lower diversity in animals that developed postpartum  
433 endometritis (See Table S2). **C)** Rarefaction analysis of observed species. The curves represent  
434 the average of each group. Error bars are the standard error of the corresponding groups.

435

436 Taxonomic assignments of OTUs at phylum level showed that the microbiome of healthy  
437 animals displays high content of Firmicutes while most cows that developed postpartum  
438 endometritis had an increased representation of Bacteroidetes (Fig 6 and Fig S2A). The median  
439 Firmicutes to Bacteroidetes ratio (F/B) in the healthy group was 4.02 while cows that developed  
440 postpartum endometritis displayed a median F/B of 0.64.

441

442 The vaginal microbiome displays different community types in both  
443 healthy and endometritic animals.

444 Hierarchical cluster analysis using a weighted UniFrac metric resulted in four clusters of samples  
445 (Fig 6A). Cluster I is formed by 16 out of the 20 samples collected from healthy animals, whose  
446 microbiomes featured the larger number of observed OTUs in the dataset ( $1297.5 \pm 584.4$ ),  
447 high diversity ( $H' 5.25 \pm 0.60$ ) and evenness ( $J', 0.75 \pm 0.07$ ) (Table 2). Cluster IV was formed by  
448 two healthy cows that displayed a microbiome with low diversity but intermediate species  
449 richness ( $H' = 1.66$  and  $J' = 0.24$ , Table S2). The phylum Firmicutes constituted the  $74.9 \pm 7\%$   
450 and  $95.1 \pm 1\%$  of the total abundance of the microbiomes of respectively clusters I and IV (Fig  
451 6A and Table 2). An important difference between clusters I and IV is that while the most  
452 abundant OTU in animals of cluster I constituted the  $12.5 \pm 7.5\%$  of the microbiome, a single  
453 OTU accounted for more than 70% of the microbiomes of cows in cluster IV.

454

455 **Figure 6. Taxonomic composition of the vaginal microbiome of cows at 7 DPP. A)** Whole-  
456 microbiome weighted UniFrac hierarchical cluster. Jackknife support of internal tree nodes is  
457 colour coded. Red, 75-100%; orange, 50-75%. The identity of the samples is given to the right of  
458 the branch tips. Scale bar represents 0.1 distance. Cluster membership as defined by the  
459 branching pattern of this dendrogram is shown at the far right of the figure and is based upon a  
460 distance cut off displayed by a dashed line. **B) and C)** Taxonomic composition at phylum and  
461 genus levels, respectively. Each bar represents the complete microbiome as observed in each of  
462 the vaginal samples. **D)** Colour key of selected phyla (within box) and genera from B and C.  
463 Superscripts: <sup>a</sup> OTUs with ambiguous assignment below the indicated taxonomic level; <sup>b</sup> OTUs  
464 that although matching reference sequences in the Greengenes 13\_8 database, no taxonomic  
465 name has been defined. In these cases, the lowest taxonomic name is provided; <sup>c</sup> OTUs  
466 matching reference sequences for which taxonomic changes above the rank of genus have  
467 been recommend by Greengenes based on whole genome phylogeny; <sup>d</sup> OTUs matching Genus

468 name contested. Complete taxonomy plots derived from QIIME are shown as supporting  
469 information (Fig S3).  
470

**Table 2. Summary of metrics for clusters obtained by Weighted Unifrac Hierarchical analysis**

| Cluster | Sequences                        | OTUs                | $H'$             | $J'$              | Chao1              | Coverage        | Characteristics                               |
|---------|----------------------------------|---------------------|------------------|-------------------|--------------------|-----------------|-----------------------------------------------|
| I       | 20752.1<br>(4284.6) <sup>a</sup> | 1297.5**<br>(584.4) | 5.25***<br>(0.6) | 0.75***<br>(0.07) | 1901.6**<br>(843)  | 93.4**<br>(3.5) | Healthy, high richness,<br>high diversity     |
| IIa     | 27010.7<br>(15756.5)             | 523<br>(160.7)      | 1.63<br>(0.7)    | 0.26<br>(0.11)    | 776.6<br>(127.5)   | 99.3<br>(0.3)   | Endometritis, low<br>richness, low diversity  |
| IIb     | 24998<br>(6137.7)                | 319.5<br>(21.9)     | 3.23<br>(0.04)   | 0.56<br>(0.01)    | 429.8<br>(35.6)    | 99.7<br>(0.1)   | Endometritis, low<br>richness, high diversity |
| III     | 26652.4<br>(6177.1)              | 435.4<br>(325.3)    | 2.28<br>(1.18)   | 0.38<br>(0.16)    | 755.9<br>(491)     | 98.3<br>(1.5)   | Endometritis, low<br>richness, low diversity  |
| IV      | 25780.5<br>(9975.2)              | 985.5*<br>(99.7)    | 1.66<br>(0.51)   | 0.24<br>(0.08)    | 1413.6*<br>(270.8) | 95.9*<br>(1.2)  | Healthy, high richness,<br>low diversity      |

<sup>a</sup> Standard deviations are given in brackets

\* P < 0.05; \*\* P < 0.01; \*\*\* P < 0.0001 indicate significantly different as compared to the same metric of non-starred clusters.

471  
472 Cows that developed postpartum endometritis branched in clusters II and III. Interestingly, both  
473 clusters displayed similar metrics. In contrast to cluster I, both cluster II and III were  
474 characterised by a lower species richness and lower diversity (Table S2). Interestingly, the  
475 vaginal microbiomes of cows N495 and N233, both classified as healthy by inspection of the  
476 vaginal mucus score, were most similar to the microbiomes of cows that developed postpartum  
477 endometritis and branched in clusters II and III, respectively (Fig 6A and Table S2). The latter  
478 was characterised by high content of Bacteroidetes (65 ± 14.7%, F/B = 0.49) (Fig S2B). In  
479 contrast, cluster II was formed by two branches differing in the number of Firmicutes and  
480 Bacteroidetes. The Firmicutes to Bacteroidetes ratio branch IIb was low (F/B = 1.46) while  
481 samples in branch IIa had very low representation of Bacteroidetes and therefore displayed a  
482 F/B of 78.83. At the phylum level both cluster IIa and IIb had a high content of Fusobacteria  
483 (~12%) relative to other clusters (Fig S2B).

484 Firmicutes in cluster I comprised OTUs belonging to classes of Clostridia and Bacilli. A single  
485 order, Clostridiales, was represented in the first, whereas the second was represented by the  
486 orders of Lactobacillales (72.2%), Bacillales (21%) and Gemellales (6.2%). The most abundant  
487 taxon in cows of cluster I, formed by OTUs assigned to the family Ruminococcaceae, which  
488 accounted for  $19.4 \pm 7.4\%$  of the abundance of the microbiome and 41.4% of Clostridia (Fig  
489 S2B). Moreover, in contrast to the low diversity in clusters IIa, III and IV, in which microbiomes  
490 were dominated by a single OTU, the combined abundance of the top five OTUs of the family  
491 Ruminococcaceae in cows of cluster I accounted for  $17.1 \pm 11.2\%$  of the taxon. Although this  
492 taxon was found in 29 out of the 30 animals under study, its relative abundance was lower in  
493 endometritic cows of clusters IIa, IIb and III ( $P < 0.01$ ). Interestingly, the representation of this  
494 taxon in cow N233, who was healthy but branched in cluster III was in similar abundance as in  
495 cows of cluster I, while OTUs affiliated to Ruminococcaceae in the two healthy cows of cluster  
496 IV constituted 4.5% and 11.5% of their microbiomes. Similar results were observed for the  
497 family of Lachnospiraceae. In addition, while single OTUs dominated the diversity of  
498 Bacteroidetes in cows that developed postpartum endometritis, healthy animals of cluster I  
499 displayed higher diversity and evenness indexes of Bacteroidetes than cows in clusters IIb and  
500 III ( $P < 0.001$ ).

501

502 The loss of diversity in vaginal microbiome of cows developing  
503 postpartum endometritis is characterised by the presence of dominant  
504 OTUs at genus level.

505 At genus level, the two cows in cluster IV produced 26 and 34 OTUs of the genus *Streptococcus*,  
506 which comprised 76.8% and 87.2% of their microbiomes. From these, a single OTU in each cow  
507 dominated at least 98% of the representation of the above genus explaining the sharp decrease  
508 in bacterial diversity (Fig 6C and Fig S2B). The high content of Bacteroidetes in 5 out of the 7  
509 cows of cluster III was due to the presence of a highly dominant OTU of the genus *Bacteroides*  
510 contributing  $52.5 \pm 24.2\%$  of the total vaginal microbiome in cows that developed postpartum  
511 endometritis. In addition, OTUs of *Porphyromonas* constituted 26.3 and 38% of the  
512 microbiomes of two cows in cluster III (Fig 6C). Cluster IIa featured a high content of Firmicutes  
513 (>80%). However, in contrast to cluster I that showed high indexes of diversity and evenness,  
514 the microbiomes of cows in cluster IIa were dominated by OTUs of the family Tissierellaceae  
515 (69.9%), of which 96% were affiliated to the genus *Helcococcus* (Fig S2B). The phylum of  
516 Firmicutes in cluster IIb also displayed high proportion of Tissierellaceae (39.6%). However, in  
517 contrast to cluster IIa, genera *ph2*, *Sporanaerobacter* and *Parvimonas* were in similar  
518 proportions and constituted 90.8% of the above family. Another important characteristic of  
519 clusters IIa and IIb is the high content of Fusobacteria. The major OTUs within this phylum had  
520 close relatives from the family Leptotrichiaceae (99% identity) and genus *Fusobacterium* (100%  
521 identity). Similar to cluster III, the OTUs with largest abundance in cows of cluster IIb were  
522 Bacteroidetes from the genus *Bacteroides* and *Porphyromonas*, respectively.

523

## 524 Discussion

525 This study revealed early signatures in the microbiome of cows that subsequently developed  
526 postpartum endometritis. T-RFLP analysis showed that these signatures were characterised by  
527 the appearance of a community associated with endometritis as well as the decline of OTUs  
528 highly represented in healthy animals. Significantly changed communities were evident at  
529 different time points between 7 DPP and 50 DPP. The occurrence of bacterial succession during  
530 the postpartum period was previously reported for bovine uterine microbiota [12,15,17]. Here,  
531 we show that this succession also includes the vaginal microbiota. The greatest differences in  
532 microbiome composition were observed at 7 DPP between cows that achieved uterine  
533 clearance and those that developed postpartum endometritis. Previous studies of either the  
534 vaginal [19–24] or uterine microbiome [11–18] have been reported but to date no study has  
535 compared the vaginal and uterine microbiomes in the same cows. Analysis of paired vaginal and  
536 uterine microbiomes at 7 DPP suggested the mixing of bacteria due to neutral processes during  
537 calving. Presented data also suggested a differentiation of the vaginal and uterine microbiomes  
538 that was most evident in cows developing postpartum endometritis.

539 Despite widespread use of vaginal mucus assessment for the clinical evaluation and  
540 classification of the reproductive health status of cows, the bovine vaginal microbiome has only  
541 recently become the focus of analysis [19–24]. Using pyrosequencing of an amplicon  
542 containing the V1 - V3 hypervariable regions of the 16S rRNA, we showed at 7DPP the presence  
543 of a complex microbiome in the vaginas of healthy cows and a dysbiotic microbiome in cows  
544 developing postpartum endometritis. High content of Firmicutes, high Firmicutes to  
545 Bacteroidetes ratio and a high diversity index were some of the most prominent features of the



546 vaginal microbiome in healthy cows. A major reduction in the vaginal bacterial diversity of cows  
547 that subsequently developed postpartum endometritis was associated with an increased  
548 abundance of OTUs of *Bacteroides*, *Helcococcus*, and *Fusobacterium*, among other genera.  
549 Similar results were recently shown in the vagina of cows [21,23]. In agreement with our data, a  
550 recent study showed that at 7 DPP the number of Bacteroidetes is significantly higher in the  
551 vagina of cows that were subsequently diagnosed with endometritis at 35 days in milk (DIM)  
552 [24]. However, other studies have found different results. For example, in contrast to major  
553 changes in the microbiome of cows developing postpartum endometritis observed in this work,  
554 the most significant difference between metritic and healthy cows was an increased rate of  
555 isolation of *E. coli* in infected cows [22]. The authors suggested a lack of a stable microbiota in  
556 the bovine vagina and concluded that vaginal bacteria were likely contaminants from different  
557 sources, including skin, faeces and/or from the environment. Although our data supports the  
558 conjecture of an unstable (i.e. changing) microbiota during the postpartum period, the bias  
559 introduced by enrichment in culture-dependent approaches is well known, as only a very small  
560 fraction of the microbiome can be cultured on any given media and growth conditions [41]. A  
561 study using denaturing gradient gel electrophoresis (DGGE) and clone libraries of 16S indicated  
562 that there is a lower bacterial diversity in the vaginal microbiome of healthy cows as compared  
563 to cows with endometritis at 30-40 DPP. Dominant taxa included *Lactobacillus* and *Weissella*  
564 while endometritic animals did not show any dominant species [20]. Interestingly, while  
565 *Bacteroides*, *Prevotella*, and *Clostridium perfringens* strains were equally prevalent in healthy  
566 and endometritic cows, *Fusobacterium*, *Enterococcus* and *E. coli* were found in higher numbers  
567 in diseased animals as determined by qPCR [20]. Another study using Ion Torrent showed

568 evidence of distinct communities in the healthy and diseased groups. *Bacteroides* and  
569 *Enterobacteriaceae* were the largest taxa in both groups [19]. However, the number of sequence  
570 reads was highly dissimilar between groups: 31,000 and less than 1000 for the endometritic and  
571 healthy groups, respectively, making difficult any comparison between the microbiomes  
572 associated with groups of different health status. While some of the varying findings among the  
573 above studies may be related to the employment of different technologies, sampling times or  
574 other factors intrinsic to each study, our findings showed that postpartum endometritis may be  
575 associated with microbiomes of varying composition. In fact, our pyrosequencing analysis  
576 showed at least three different vaginal microbiome types associated with cows developing  
577 postpartum endometritis. Microbiome type IIa was dominated by OTUs of the genus  
578 *Helcococcus* while types IIb and III were characterised by a large content of *Bacteroides*.  
579 *Fusobacteria* was higher in vaginal microbiome types IIa and IIb than in type III and rare in  
580 healthy animals. Whether different microbiome types correspond to different types of  
581 postpartum endometritis or represent intermediate states of recovery into a healthy  
582 microbiome is yet to be determined.

583 In agreement with our T-RFLP data, suggesting an arrest of the differentiation of the vaginal  
584 and uterine microbiomes in cows developing postpartum endometritis, *Bacteroides* and  
585 *Fusobacterium* have been found to be most abundant in the uterine microbiome of cows with  
586 uterine infection at different times postpartum [11,14,16–18,42,43]. Sequencing of the V4  
587 hypervariable region of the 16S rRNA showed the progression of the uterine microbiome of  
588 dairy cows during the first 6 DPP [17]. A rapid succession resulted in a shift from Proteobacteria  
589 to Bacteroidetes and Fusobacteria as the most abundant phyla in the uterus of metritic cows.

590 Similar to our findings in vagina, diseased cows displayed lower uterine bacterial richness and  
591 diversity indices related to an increased abundance of OTUs of *Bacteroides*, *Porphyromonas*  
592 and *Fusobacterium* [17,18]. Failure to cure metritis, either spontaneously or with antibiotic  
593 treatment, was related to increased relative abundances of the above genera and a  
594 corresponding decrease in bacterial diversity in uterus [18]. In a study relying on DGGE and  
595 analysis of clone libraries, the uterine fluid of two healthy and two metritic cows at 10 DPP  
596 showed that the most abundant OTUs in metritic cows belonged to the phylum Fusobacteria  
597 followed by Bacteroidetes [11]. Another study based on pair-ended MiSeq sequencing of an  
598 amplicon containing the V1 and V2 hypervariable regions of the 16S DNA of uterine fluids  
599 obtained from cows with pyometra, slaughtered at no less than 22 DPP, found that the five  
600 most abundant OTUs in uterine fluids belonged to families of Fusobacteriaceae,  
601 Bacteroidaceae, Pasteurellaceae and Porphyromonadaceae [16]. A higher prevalence of  
602 *Bacteroides* and *Fusobacterium* was also reported upon pyrosequencing analysis of V1 and V2  
603 hypervariable regions of the microbiota of uterine lavages of cows with severe endometritis at  
604 35 DIM as compared to either the healthy group or to cows with mild endometritis [14]. In  
605 another study, Ruminococcaceae, Bacteroidaceae, and an unclassified family that belonged to  
606 class Bacteroidia were the three most abundant families in endometrial biopsies from healthy  
607 cows at 4 weeks postpartum (WPP) as well as from both healthy and endometritic cows at 7  
608 WPP [15]. Interestingly, our pyrosequencing analysis showed that Ruminococcaceae and  
609 Bacteroidaceae were the top one and six most abundant families in the vaginal microbiome of  
610 healthy cows at 7 DPP. In addition, the T-RFLP data showed that the differentiation between  
611 vaginal and uterine communities of endometritic cows was evident from a decreased similarity

612 in paired samples. Taken together, our data and those of others are consistent with a bacterial  
613 succession in the reproductive tract in which the differentiation of vaginal and uterine  
614 microbiomes towards the recovery of their native states are conducive to reproductive health  
615 and the achievement of a new pregnancy. Conversely, a delayed differentiation of vaginal and  
616 uterine microbiomes is in line with impaired uterine clearance, decreased conception rates and  
617 lower success of first service pregnancy rates in the endometritic cow [44]. Interestingly, high  
618 prevalence of *Bacteroides*, *Ureaplasma*, *Fusobacterium* and *Arcanobacterium* were still  
619 observed in the uterine microbiome of cows that failed to become pregnant after 200 DIM [14],  
620 strengthening the link between a severe arrest in the differentiation of the uterine microbiome  
621 and poor fertility.

622 Bacterial infection and tissue damage is a normal event occurring in the postpartum period.  
623 Involution of the postpartum uterus is a highly regulated process in which an early  
624 inflammatory response early postpartum is followed by a stage of proliferation and repair [2,3].  
625 Comparison of RNAseq profiles of the endometrium at 7 and 21 DPP unveiled that the above  
626 transition was arrested in cows with cytological endometritis [27]. Sustained inflammation was  
627 also observed in the endometrium of cows with postpartum endometritis in the same time  
628 frame [45]. The observed collapse in the diversity of the vaginal microbiome of endometritic  
629 cows at 7 DPP and the arrested differentiation of vaginal and uterine microbiomes in cows  
630 developing postpartum endometritis are in line with those data. A likely scenario implies  
631 different metabolic landscapes in the reproductive tract of healthy and endometritic cows early  
632 after calving, resulting from their distinct microbiotas. Support for the above scenario comes  
633 from recent metagenomic analyses of the microbiome of the bovine uterus where significant

634 differences in the repertoire of functional gene categories were observed in healthy and  
635 metritic cows within 3 and 12 DIM [42] and cows with purulent vaginal discharge between 25  
636 and 35 DPP [43]. These studies showed that adhesins, bacteriocins and antibacterial peptides  
637 and tolerance to colicin E2 are produced only by the uterine microbiota of healthy cows early  
638 postpartum and continues until at least 35 DPP. In contrast, the uterine microbiota of metritic  
639 and PDV cows appears to change from cold shock and acid stress in the former to increased  
640 modification of lipid A and production of toxins in the later [42]. Changes in the composition of  
641 the microbiome, and therefore in the metabolic landscape of the reproductive tract, may  
642 impact uterine involution as a result of the dysregulated inflammatory response induced by the  
643 presence of highly abundant bacteria activating specific signalling pathways and thus causing a  
644 different pattern of endometrial gene expression [46]. This in turn is likely to affect the  
645 transition from the inflammatory to proliferation and repair stage of the postpartum uterus  
646 observed in healthy cows [2,27]. It is difficult to establish causality between dysbiosis and  
647 inflammation [47]. Thus, it is not clear if changes in the composition of the microbiome precede  
648 the inability of the cow to regulate the immune response or whether both the microbiome and  
649 the dysregulated inflammatory response are factors predisposing the onset of postpartum  
650 endometritis. In any case, a synergistic effect may occur where failure of each of these factors  
651 exacerbates the other. In other words, failure to clear a highly changed microbiome  
652 characterised by a low bacterial diversity and dominated by few bacterial taxa may set an  
653 innate immune response in overdrive. Alternatively, an excessive inflammatory response may  
654 contribute to the differential elimination of bacterial species, allowing the overgrowth of  
655 bacteria able to avoid the innate immune response.

656

## 657 Acknowledgements

658 The authors acknowledge the contribution of farmers who participated in this study. We thank

659 Fiona Carter, Maria Benson and Carlotta Sacchi for providing technical assistance.

660

661

## 662 References

### 663 Reference List

664

- 665 1. Sheldon IM, Williams EJ, Miller AN, Nash DM, Herath S (2008) Uterine diseases in cattle after  
666 parturition. *Vet J* 176: 115-121.
- 667 2. Foley C, Chapwanya A, Creevey CJ, Narciandi F, Morris D, Kenny EM, Cormican P, Callanan JJ,  
668 O'Farrelly C, Meade KG (2012) Global endometrial transcriptomic profiling: transient  
669 immune activation precedes tissue proliferation and repair in healthy beef cows. *BMC*  
670 *Genomics* 13: 489.
- 671 3. Chapwanya A, Meade KG, Foley C, Narciandi F, Evans AC, Doherty ML, Callanan JJ, O'Farrelly C  
672 (2012) The postpartum endometrial inflammatory response: a normal physiological  
673 event with potential implications for bovine fertility. *Reprod Fertil Dev* 24: 1028-1039.
- 674 4. Sheldon IM, Cronin J, Goetze L, Donofrio G, Schuberth HJ (2009) Defining postpartum uterine  
675 disease and the mechanisms of infection and immunity in the female reproductive tract  
676 in cattle. *Biol Reprod* 81: 1025-1032.
- 677 5. Williams EJ, Fischer DP, Pfeiffer DU, England GC, Noakes DE, Dobson H, Sheldon IM (2005)  
678 Clinical evaluation of postpartum vaginal mucus reflects uterine bacterial infection and  
679 the immune response in cattle. *Theriogenology* 63: 102-117.
- 680 6. Olson JD, Ball L, Mortimer RG, Farin PW, Adney WS, Huffman EM (1984) Aspects of bacteriology  
681 and endocrinology of cows with pyometra and retained fetal membranes. *Am J Vet Res*  
682 45: 2251-2255.
- 683 7. Elliott L, McMahon KJ, Gier HT, Marion GB (1968) Uterus of the cow after parturition: bacterial  
684 content. *Am J Vet Res* 29: 77-81.
- 685 8. Griffin JF, Hartigan PJ, Nunn WR (1974) Non-specific uterine infection and bovine fertility. I.  
686 Infection patterns and endometritis during the first seven weeks post-partum.  
687 *Theriogenology* 1: 91-106.
- 688 9. Williams EJ, Fischer DP, Noakes DE, England GCW, Rycroft A, Dobson H, Sheldon IM (2007) The  
689 relationship between uterine pathogen growth density and ovarian function in the  
690 postpartum dairy cow. *Theriogenology* 68: 549-559.
- 691 10. Leblanc SJ, Osawa T, Dubuc J (2011) Reproductive tract defense and disease in postpartum dairy  
692 cows. *Theriogenology* 76: 1610-1618.
- 693 11. Santos TM, Gilbert RO, Bicalho RC (2011) Metagenomic analysis of the uterine bacterial  
694 microbiota in healthy and metritic postpartum dairy cows. *J Dairy Sci* 94: 291-302.
- 695 12. Santos TM, Bicalho RC (2012) Diversity and succession of bacterial communities in the uterine  
696 fluid of postpartum metritic, endometritic and healthy dairy cows. *PLoS ONE* 7: e53048.

- 697 13. Peng Y, Wang Y, Hang S, Zhu W (2013) Microbial diversity in uterus of healthy and metritic  
698 postpartum Holstein dairy cows. *Folia Microbiologica* 58: 593-600.
- 699 14. Machado VS, Oikonomou G, Bicalho ML, Knauer WA, Gilbert R, Bicalho RC (2012) Investigation  
700 of postpartum dairy cows' uterine microbial diversity using metagenomic  
701 pyrosequencing of the 16S rRNA gene. *Vet Microbiol* 159: 460-469.
- 702 15. Knudsen LRV, Karstrup CC, Pedersen HG, Angen O, Agerholm JS, Rasmussen EL, Jensen TK,  
703 Klitgaard K (2016) An investigation of the microbiota in uterine flush samples and  
704 endometrial biopsies from dairy cows during the first 7 weeks postpartum.  
705 *Theriogenology* 86: 642-650.
- 706 16. Knudsen LR, Karstrup CC, Pedersen HG, Agerholm JS, Jensen TK, Klitgaard K (2015) Revisiting  
707 bovine pyometra--new insights into the disease using a culture-independent deep  
708 sequencing approach. *Vet Microbiol* 175: 319-324.
- 709 17. Jeon SJ, Vieira-Neto A, Gobikrushanth M, Daetz R, Mingoti RD, Parize ACB, de Freitas SL, da  
710 Costa ANL, Bicalho RC, Lima S, Jeong KC, Galvão KN (2015) Uterine microbiota  
711 progression from calving until establishment of metritis in dairy cows. *Applied and  
712 Environmental Microbiology* .
- 713 18. Jeon SJ, Lima FS, Vieira-Neto A, Machado VS, Lima SF, Bicalho RC, Santos JE, Galvão KN (2018)  
714 Shift of uterine microbiota associated with antibiotic treatment and cure of metritis in  
715 dairy cows. *Vet Microbiol* 214: 132-139.
- 716 19. Rodrigues NF, Kastle J, Coutinho TJ, Amorim AT, Campos GB, Santos VM, Marques LM,  
717 Timenetsky J, de Farias ST (2015) Qualitative analysis of the vaginal microbiota of  
718 healthy cattle and cattle with genital-tract disease. *Genet Mol Res* 14: 6518-6528.
- 719 20. Wang J, Sun C, Liu C, Yang Y, Lu W (2016) Comparison of vaginal microbial community structure  
720 in healthy and endometritis dairy cows by PCR-DGGE and real-time PCR. *Anaerobe* 38:  
721 1-6.
- 722 21. Laguardia-Nascimento M, Branco KMGR, Gasparini MR, Giannattasio-Ferraz S, Leite LR, Araujo  
723 FMG, Salim ACdM, Nicoli JR, de Oliveira GCa, Barbosa-Stancioli EF (2015) Vaginal  
724 Microbiome Characterization of Nelore Cattle Using Metagenomic Analysis. *PLoS One*  
725 10: e0143294.
- 726 22. Wang Y, Ametaj BN, Ambrose DJ, Ganzle MG (2013) Characterisation of the bacterial microbiota  
727 of the vagina of dairy cows and isolation of pediocin-producing *Pediococcus acidilactici*.  
728 *BMC Microbiol* 13: 19.
- 729 23. Wang Y, Wang J, Li H, Fu K, Pang B, Yang Y, Liu Y, Tian W, Cao R (2018) Characterization of the  
730 cervical bacterial community in dairy cows with metritis and during different  
731 physiological phases. *Theriogenology* 108: 306-313.
- 732 24. Bicalho MLS, Santin T, Rodrigues MX, Marques CE, Lima SF, Bicalho RC (2017) Dynamics of the  
733 microbiota found in the vaginas of dairy cows during the transition period: Associations



- 734 with uterine diseases and reproductive outcome. *Journal of Dairy Science* 100: 3043-  
735 3058.
- 736 25. Sheldon IM, Lewis GS, LeBlanc S, Gilbert RO (2006) Defining postpartum uterine disease in  
737 cattle. *Theriogenology* 65: 1516-1530.
- 738 26. Sheldon IM, Noakes DE, Rycroft AN, Pfeiffer DU, Dobson H (2002) Influence of uterine bacterial  
739 contamination after parturition on ovarian dominant follicle selection and follicle  
740 growth and function in cattle. *Reproduction* 123: 837-845.
- 741 27. Foley C, Chapwanya A, Callanan J, Whiston R, Miranda-CasoLuengo R, Lu J, Meijer W, Lynn D, O'  
742 Farrelly C, Meade K (2015) Integrated analysis of the local and systemic changes  
743 preceding the development of post-partum cytological endometritis. *BMC Genomics* 16:  
744 811.
- 745 28. Frank JA, Reich CI, Sharma S, Weisbaum JS, Wilson BA, Olsen GJ (2008) Critical evaluation of two  
746 primers commonly used for amplification of bacterial 16S rRNA genes. *Appl Environ*  
747 *Microbiol* 74: 2461-2470.
- 748 29. Heuer H, Krsek M, Baker P, Smalla K, Wellington EM (1997) Analysis of actinomycete  
749 communities by specific amplification of genes encoding 16S rRNA and gel-  
750 electrophoretic separation in denaturing gradients. *Appl Environ Microbiol* 63: 3233-  
751 3241.
- 752 30. Wang Y, Qian PY (2009) Conservative Fragments in Bacterial 16S rRNA Genes and Primer Design  
753 for 16S Ribosomal DNA Amplicons in Metagenomic Studies. *PLoS One* 4: e7401.
- 754 31. Smith CJ, Danilowicz BS, Clear AK, Costello FJ, Wilson B, Meijer WG (2005) T-Align, a web-based  
755 tool for comparison of multiple terminal restriction fragment length polymorphism  
756 profiles. *FEMS Microbiol Ecol* 54: 375-380.
- 757 32. Clarke K, Gorley R (2006) PRIMER v6: User Manual/Tutorial. PRIMER-E, Plymouth .
- 758 33. Caporaso JG, Kuczynski J, Stombaugh J, Bittinger K, Bushman FD, Costello EK, Fierer N, Pena AG,  
759 Goodrich JK, Gordon JI, Huttley GA, Kelley ST, Knights D, Koenig JE, Ley RE, Lozupone CA,  
760 McDonald D, Muegge BD, Pirrung M, Reeder J, Sevinsky JR, Turnbaugh PJ, Walters WA,  
761 Widmann J, Yatsunenko T, Zaneveld J, Knight R (2010) QIIME allows analysis of high-  
762 throughput community sequencing data. *Nat Meth* 7: 335-336.
- 763 34. Reeder J, Knight R (2010) Rapidly denoising pyrosequencing amplicon reads by exploiting rank-  
764 abundance distributions. *Nat Meth* 7: 668-669.
- 765 35. Haas BJ, Gevers D, Earl AM, Feldgarden M, Ward DV, Giannoukos G, Ciulla D, Tabbaa D,  
766 Highlander SK, Sodergren E, Methe B, DeSantis TZ, Petrosino JF, Knight R, Birren BW  
767 (2011) Chimeric 16S rRNA sequence formation and detection in Sanger and 454-  
768 pyrosequenced PCR amplicons. *Genome Res* 21: 494-504.
- 769 36. Edgar RC (2010) Search and clustering orders of magnitude faster than BLAST. *Bioinformatics* 26:  
770 2460-2461.

- 771 37. Caporaso JG, Bittinger K, Bushman FD, DeSantis TZ, Andersen GL, Knight R (2010) PyNAST: a  
772 flexible tool for aligning sequences to a template alignment. *Bioinformatics* 26: 266-267.
- 773 38. Price MN, Dehal PS, Arkin AP (2010) FastTree 2 – Approximately Maximum-Likelihood Trees for  
774 Large Alignments. *PLoS One* 5: e9490.
- 775 39. Lozupone C, Knight R (2005) UniFrac: a New Phylogenetic Method for Comparing Microbial  
776 Communities. *Applied and Environmental Microbiology* 71: 8228-8235.
- 777 40. Venkataraman A, Bassis CM, Beck JM, Young VB, Curtis JL, Huffnagle GB, Schmidt TM (2015)  
778 Application of a Neutral Community Model To Assess Structuring of the Human Lung  
779 Microbiome. *mBio* 6: e02284-14.
- 780 41. Torsvik V, Goksøyr J, Daae FL (1990) High diversity in DNA of soil bacteria. *Appl Environ*  
781 *Microbiol* 56: 782-787.
- 782 42. Bicalho MLS, Machado VS, Higgins CH, Lima FS, Bicalho RC (2017) Genetic and functional analysis  
783 of the bovine uterine microbiota. Part I: Metritis versus healthy cows. *Journal of Dairy*  
784 *Science* 100: 3850-3862.
- 785 43. Bicalho MLS, Lima S, Higgins CH, Machado VS, Lima FS, Bicalho RC (2017) Genetic and functional  
786 analysis of the bovine uterine microbiota. Part II: Purulent vaginal discharge versus  
787 healthy cows. *Journal of Dairy Science* 100: 3863-3874.
- 788 44. Crowe MA, Williams EJ (2012) TRIENNIAL LACTATION SYMPOSIUM: Effects of stress on  
789 postpartum reproduction in dairy cows. *J Anim Sci* 90: 1722-1727.
- 790 45. Adnane M, Chapwanya A, Kaidi R, Meade KG, O'Farrelly C (2017) Profiling inflammatory  
791 biomarkers in cervico-vaginal mucus (CVM) postpartum: Potential early indicators of  
792 bovine clinical endometritis? *Theriogenology* 103: 117-122.
- 793 46. Carneiro LC, Cronin JG, Sheldon IM (2016) Mechanisms linking bacterial infections of the bovine  
794 endometrium to disease and infertility. *Reprod Biol* 16: 1-7.
- 795 47. Zhu W, Winter MG, Byndloss MX, Spiga L, Duerkop BA, Hughes ER, Büttner L, de Lima Romão E,  
796 Behrendt CL, Lopez CA, Sifuentes-Dominguez L, Huff-Hardy K, Wilson RP, Gillis CC, Tükel  
797 Ç, Koh AY, Burstein E, Hooper LV, Bäumlner AJ, Winter SE (2018) Precision editing of the  
798 gut microbiota ameliorates colitis. *Nature* 553: 208.
- 799  
800

## 802 Supporting information

803 **Table S1. Dataset of Terminal Restriction Fragment Length Polymorphism.** (DOCX)

804 **Table S2. Diversity metrics of the vaginal microbiome of dairy cows at 7 days postpartum.**

805 (DOCX)

806 **Figure S1. Hierarchical cluster analysis of pre-calving dairy cows based of their vaginal**

807 **microbiomes.** The microbiomes associated with vaginal samples obtained from cows before

808 calving were compared in a resemblance matrix based on the Bray-Curtis similarity. The health

809 status of each cow was assessed depending on the outcome of the transient postpartum

810 infection. The tips of the branches are colour coded according to the outcome of postpartum

811 health status: Black, non-susceptible; Red, susceptible to postpartum endometritis. Community

812 profiles were determined by T-RFLP of the 16S rRNA as described in the section of Materials

813 and Methods. Analysis was performed in PRIMER6 and the figure was re-drawn in CorelDraw

814 X4. (TIF)

815 **Figure S2. Category-based taxonomic composition of the vaginal microbiome of cows at 7**

816 **DPP.** Taxonomic composition at phylum and genus levels, respectively. Each bar represents the

817 average of the vaginal microbiome in each of the following categories: **A)** Clinical assignment. h,

818 healthy; e, endometritis **B)** Cluster as defined in Figure 6A, **C)** Farm of collection. The colour key

819 of selected phyla (within box) and genera from A, B and C is placed at the right of the figure.

820 Superscripts: <sup>a</sup> OTUs with ambiguous assignment below the indicated taxonomic level; <sup>b</sup> OTUs

821 that although matching reference sequences in the Greengenes 13\_8 database, no taxonomic

822 name has been defined. In these cases, the lowest taxonomic name is provided; <sup>c</sup> OTUs  
823 matching reference sequences for which taxonomic changes above the rank of genus have  
824 been recommend by Greengenes based on whole genome phylogeny; <sup>d</sup> OTUs matching Genus  
825 name contested. (TIF)

826 **Fig S3. Summary of the taxonomic composition of the vaginal microbiome of cows at 7 DPP.**

827 (HTML) Original output generated by QIIME. To visualise it double click on bar\_charts.html.

828

829

830

**A**

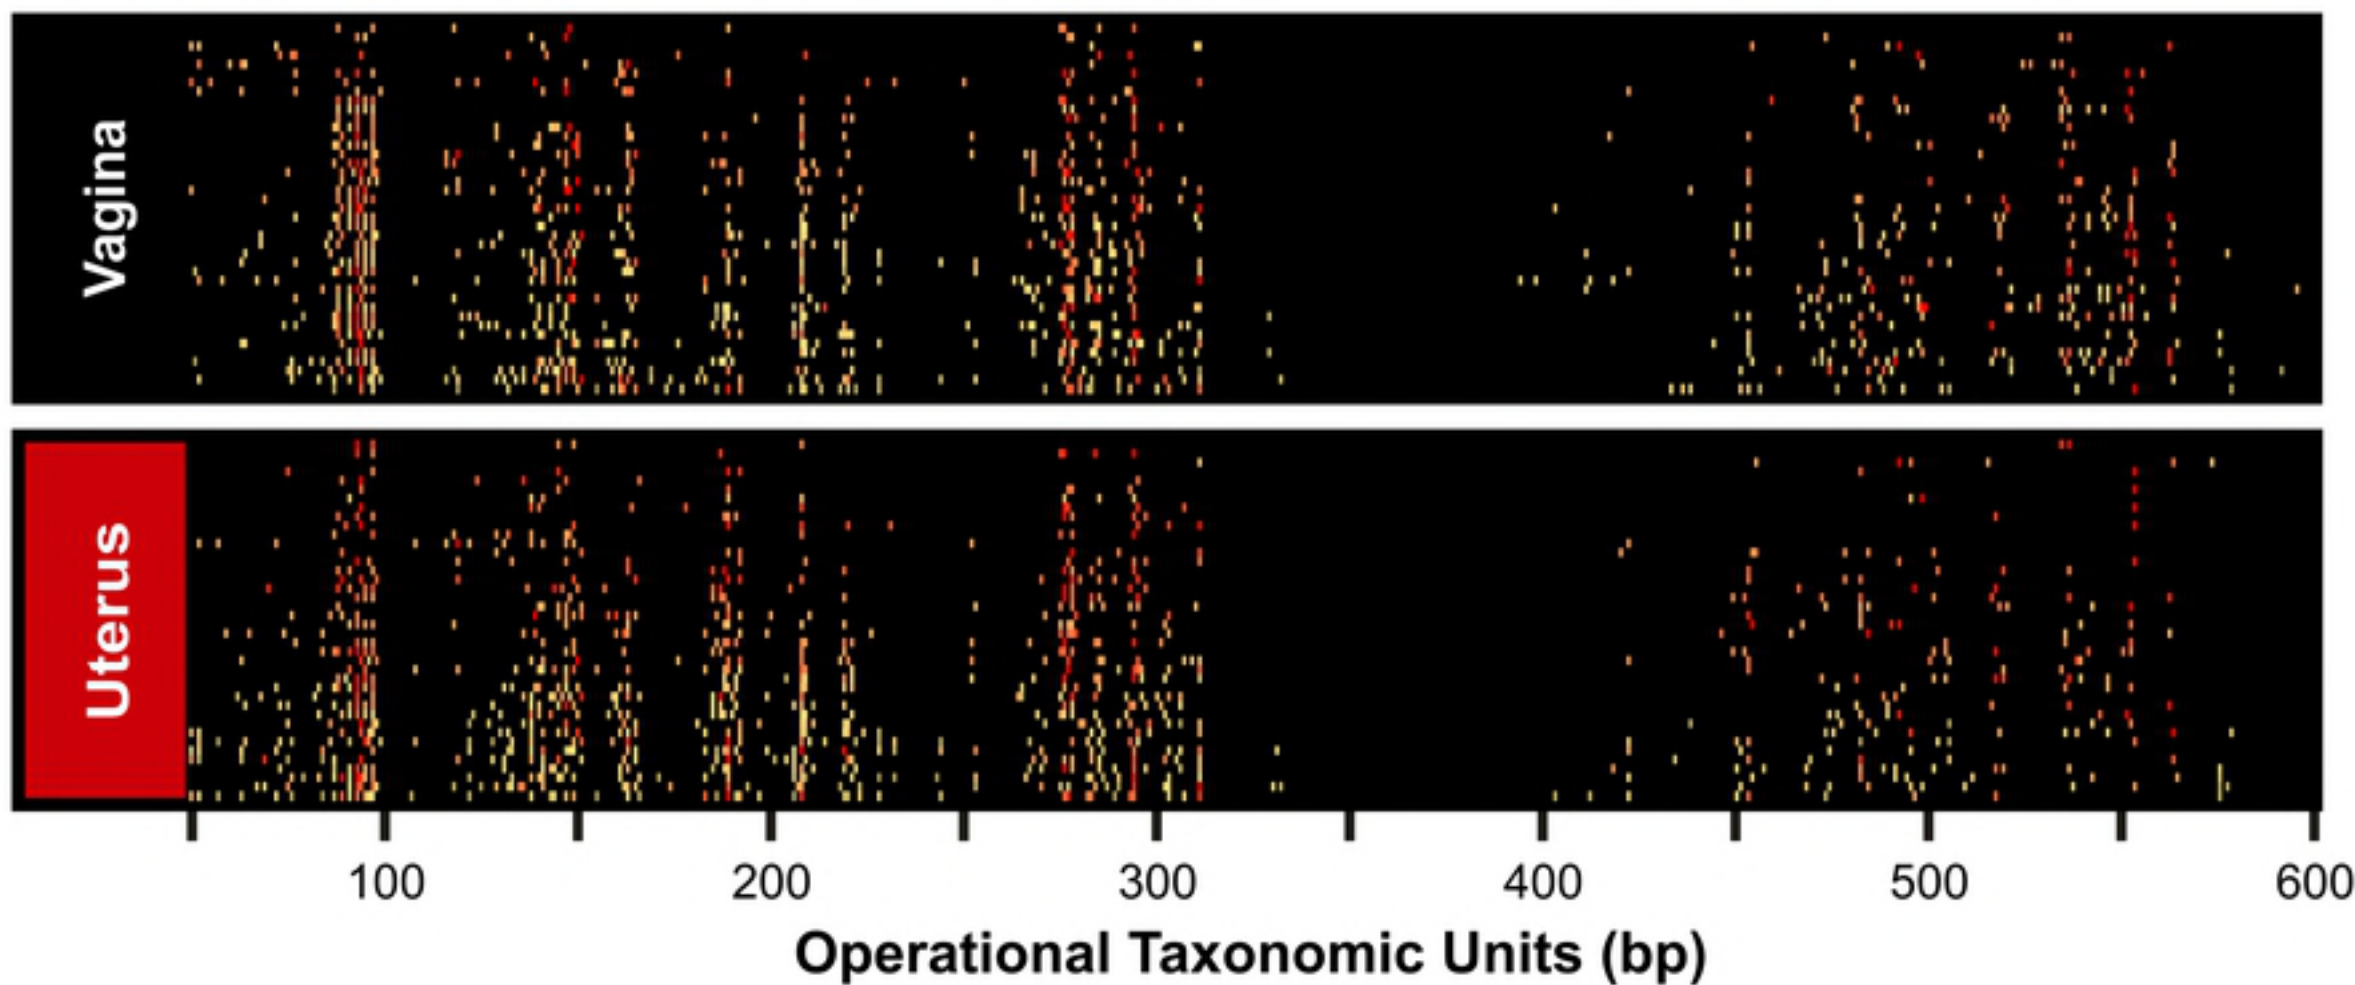

**B**

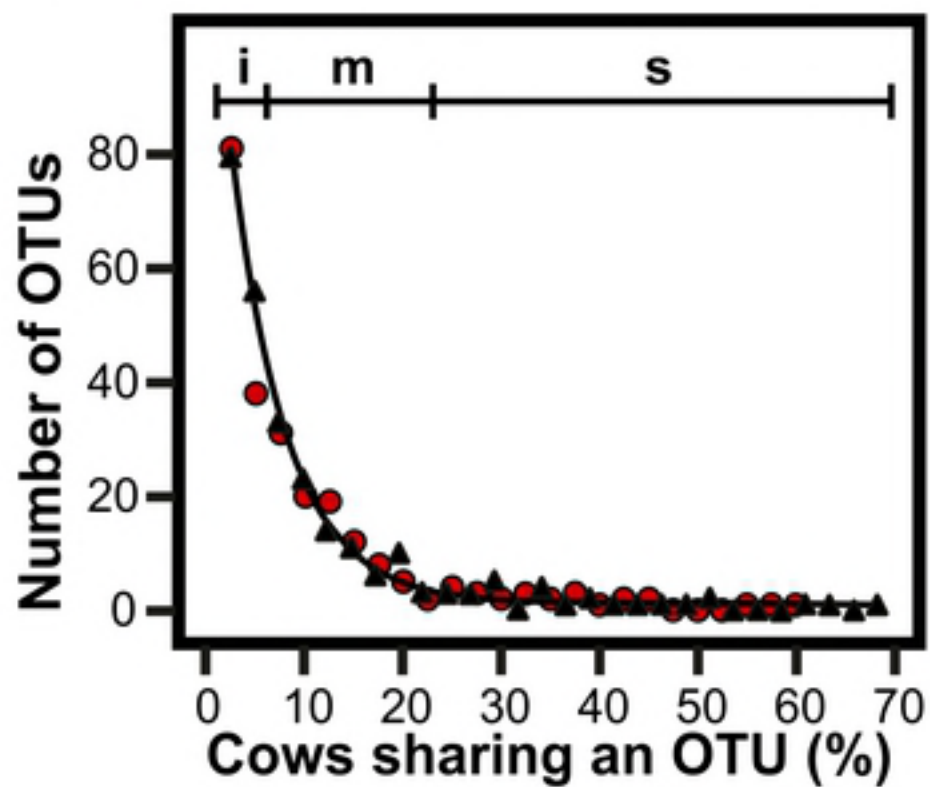

**C**

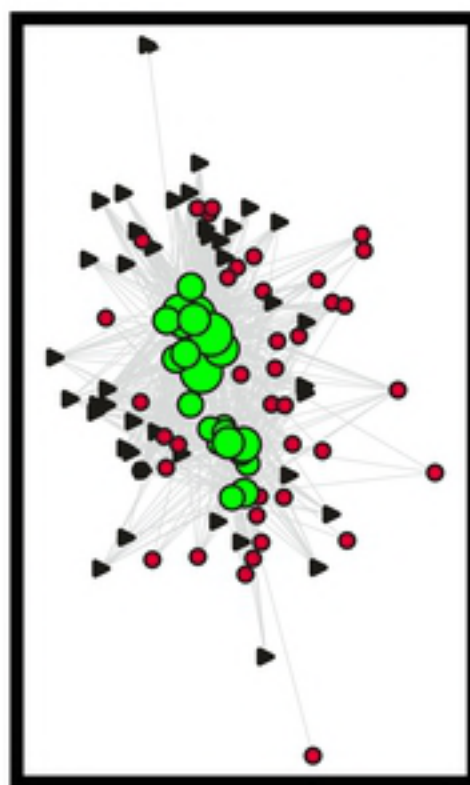

**D**

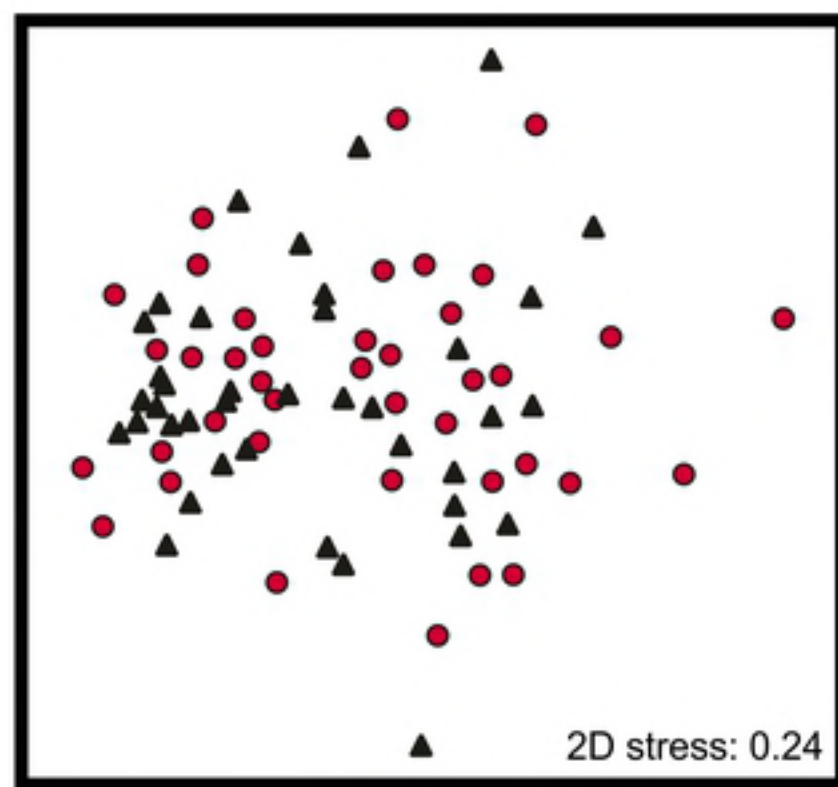

**A**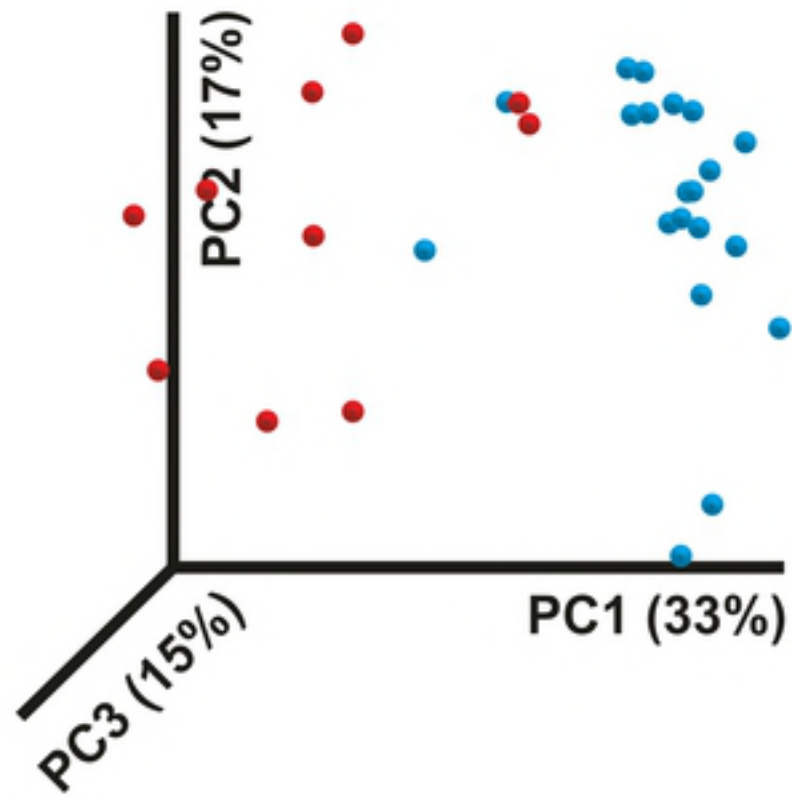**B**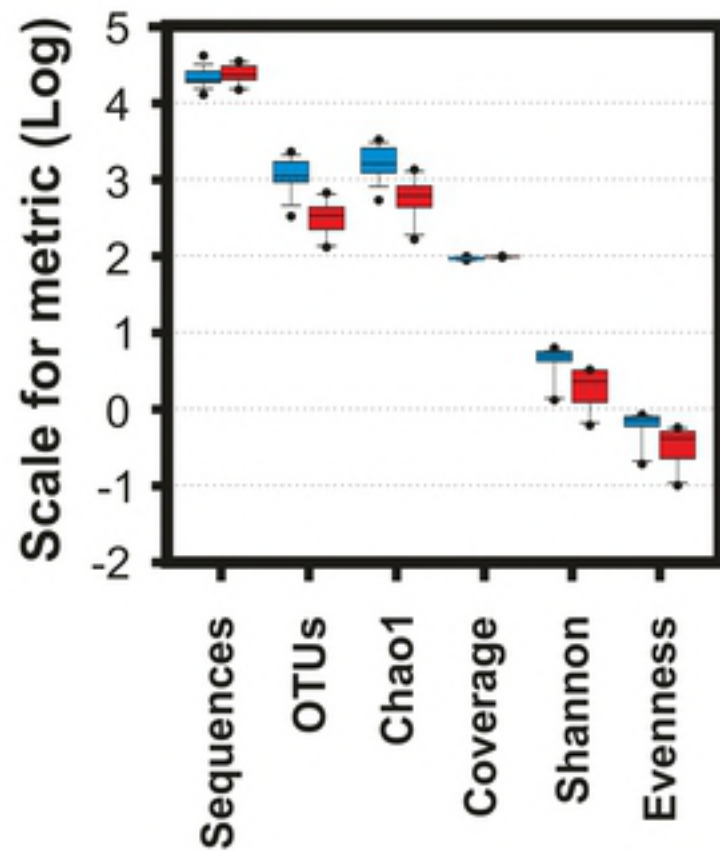**C**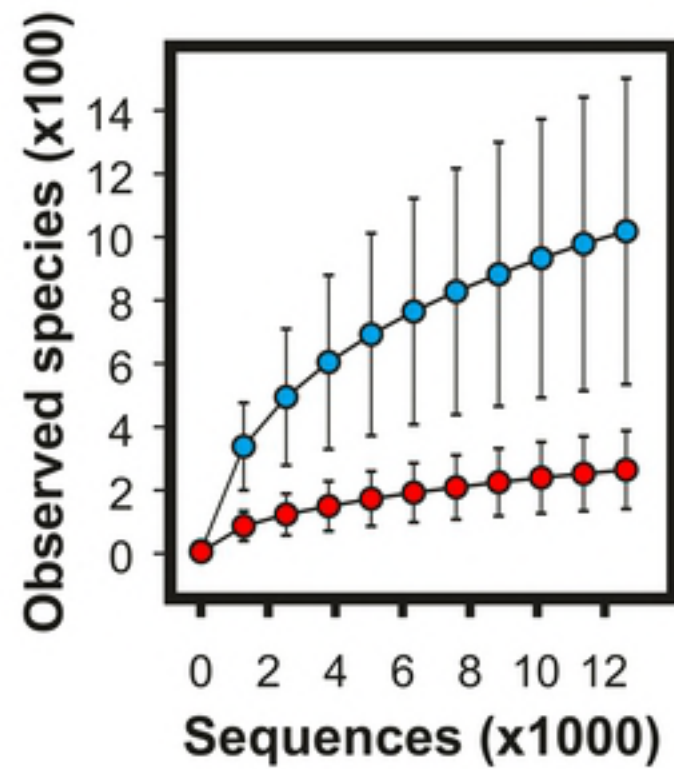

**A**

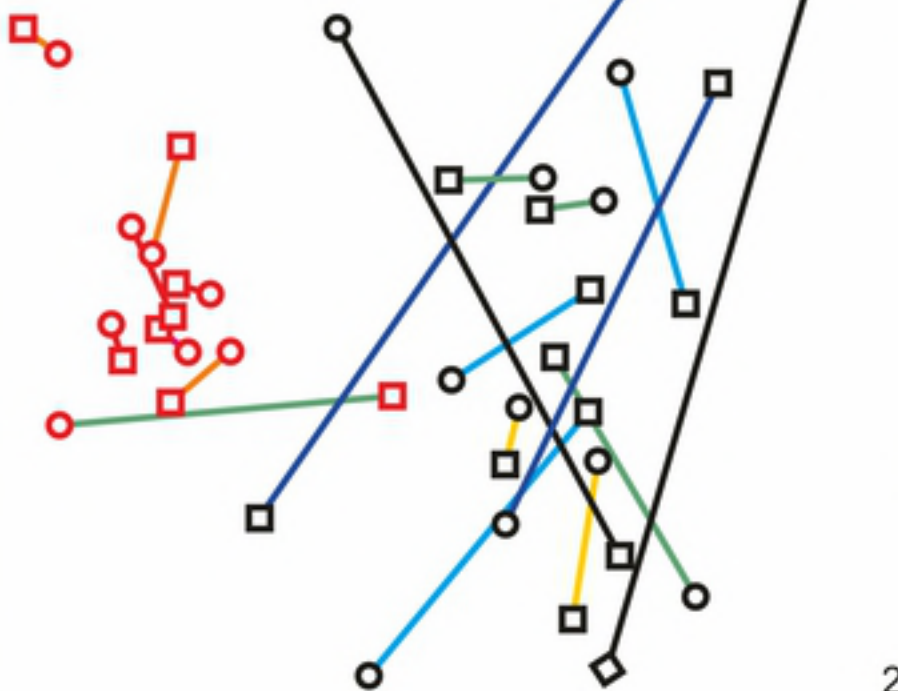

**Symbol key**

- Vagina Healthy
- Uterus Healthy
- Vagina Endo
- Uterus Endo

**Similarity (%)**

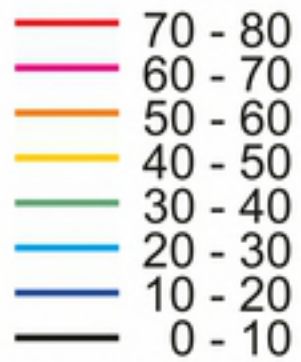

2D Stress: 0.2

**B**

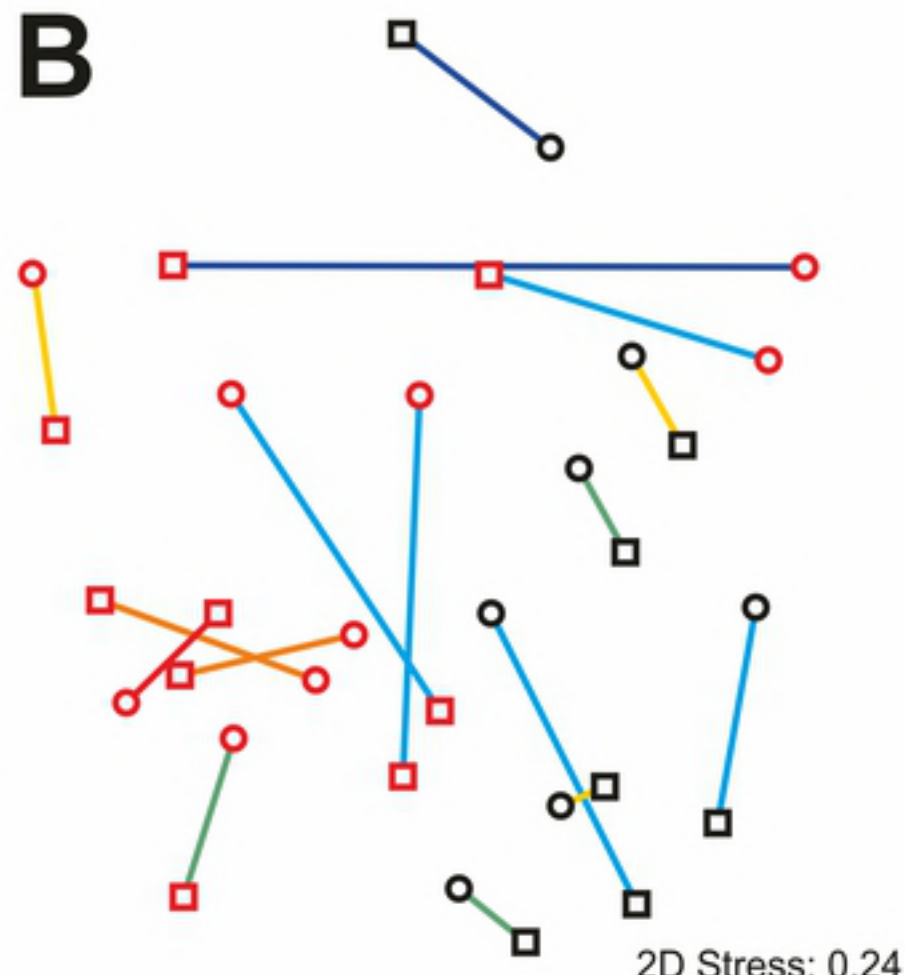

2D Stress: 0.24

**C**

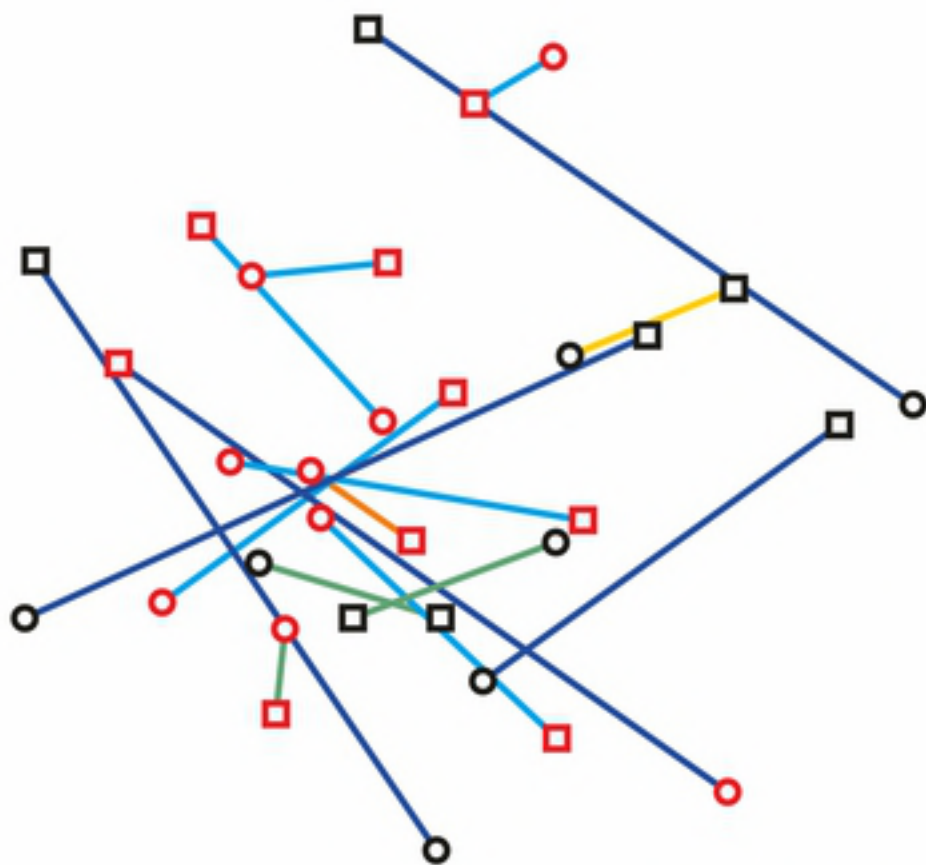

2D Stress: 0.26

**D**

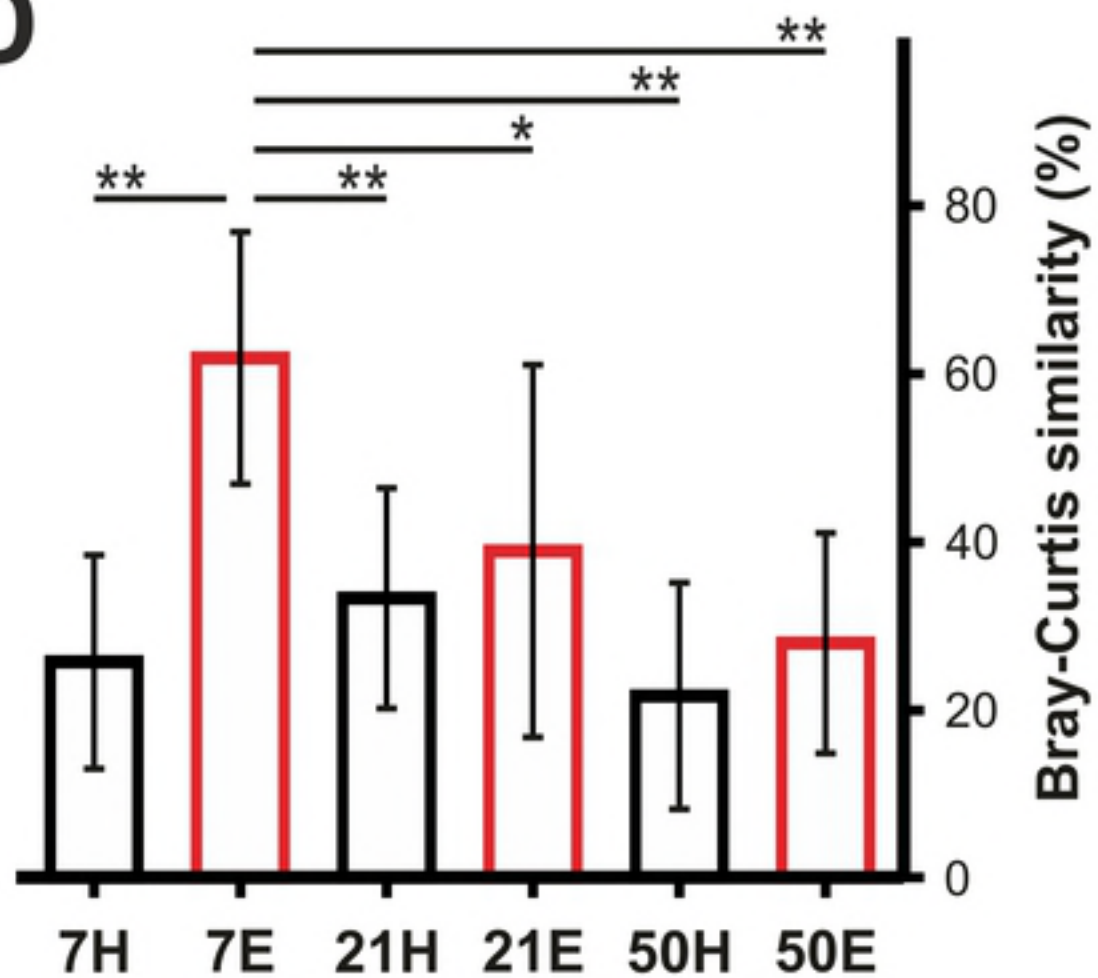

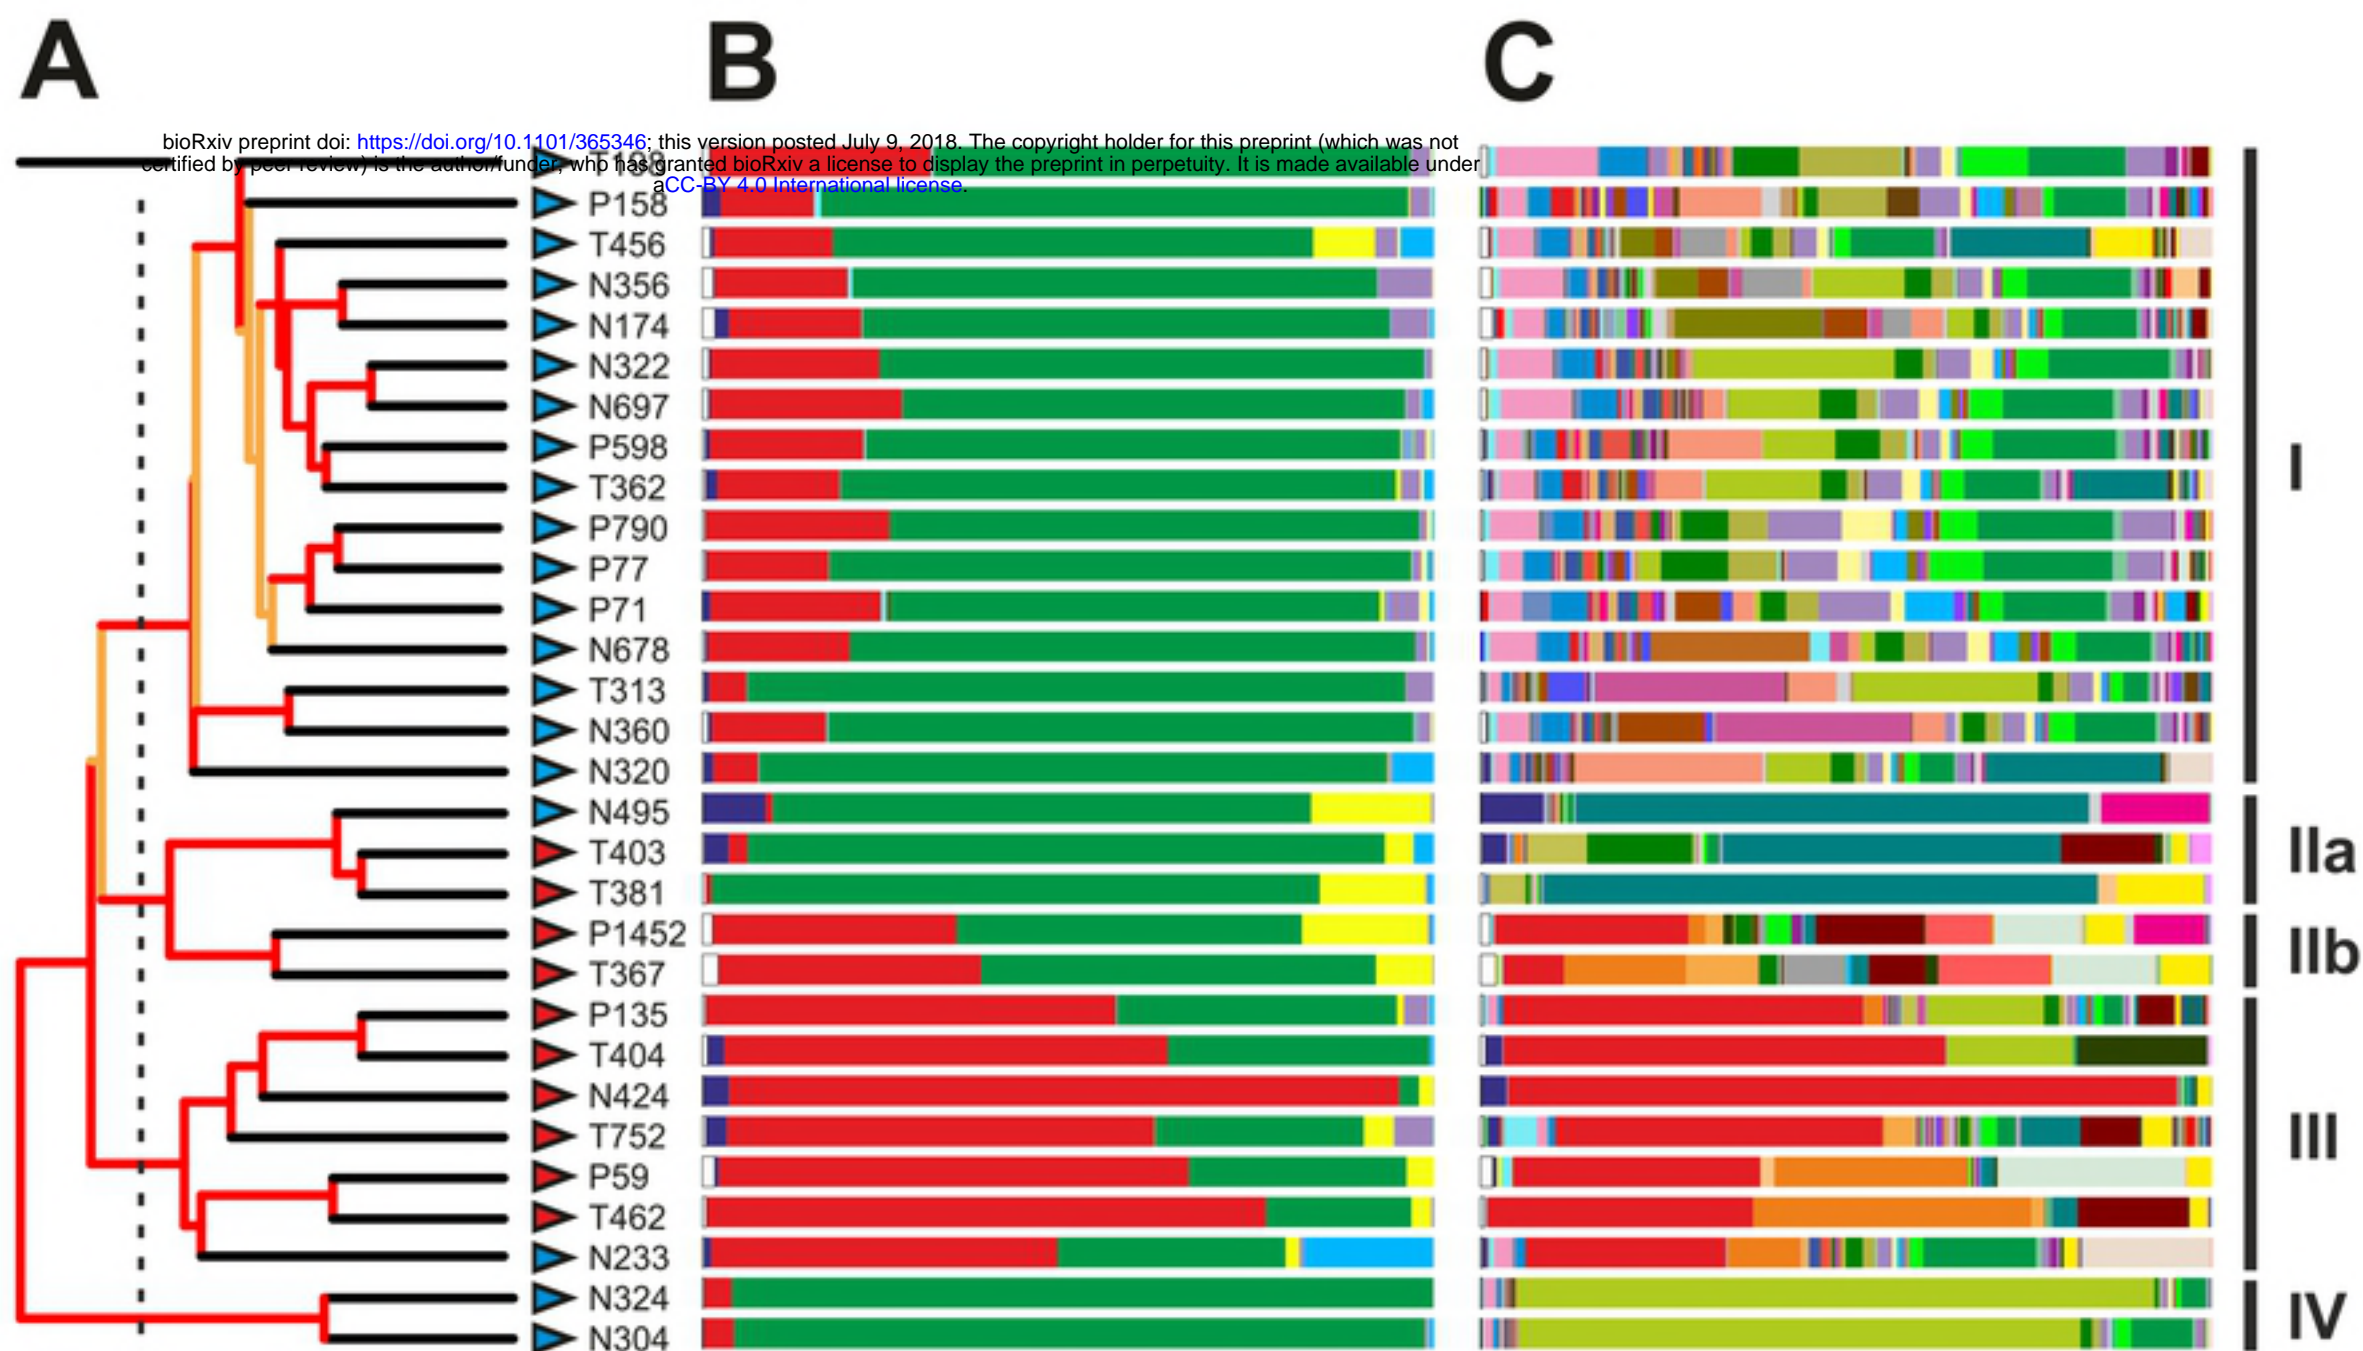



**A**

Samples

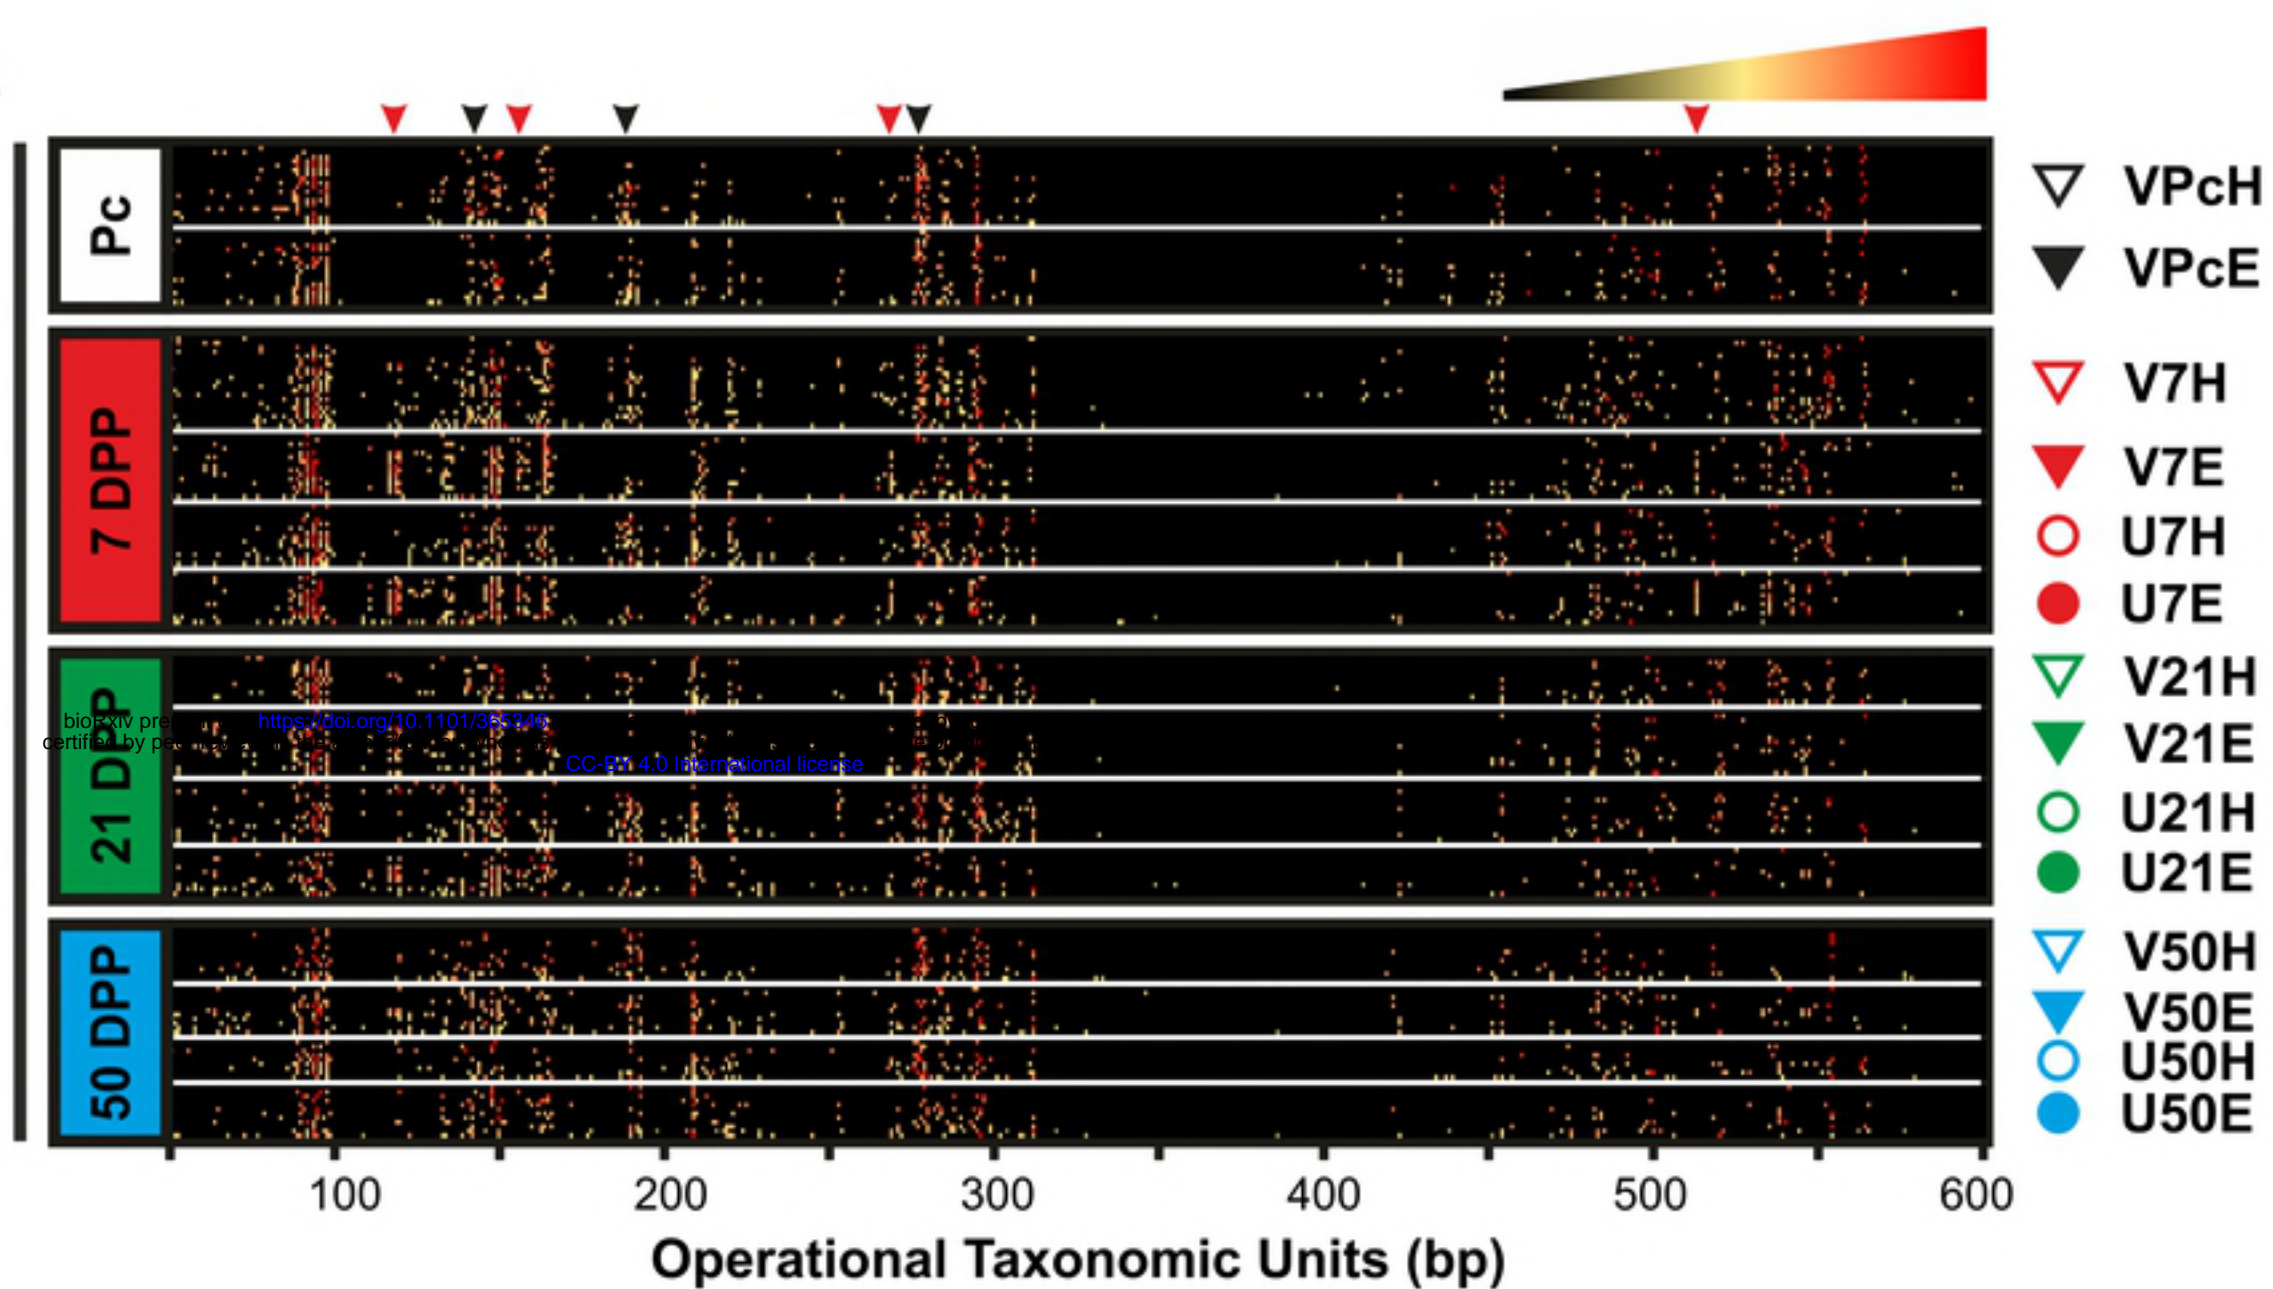**B**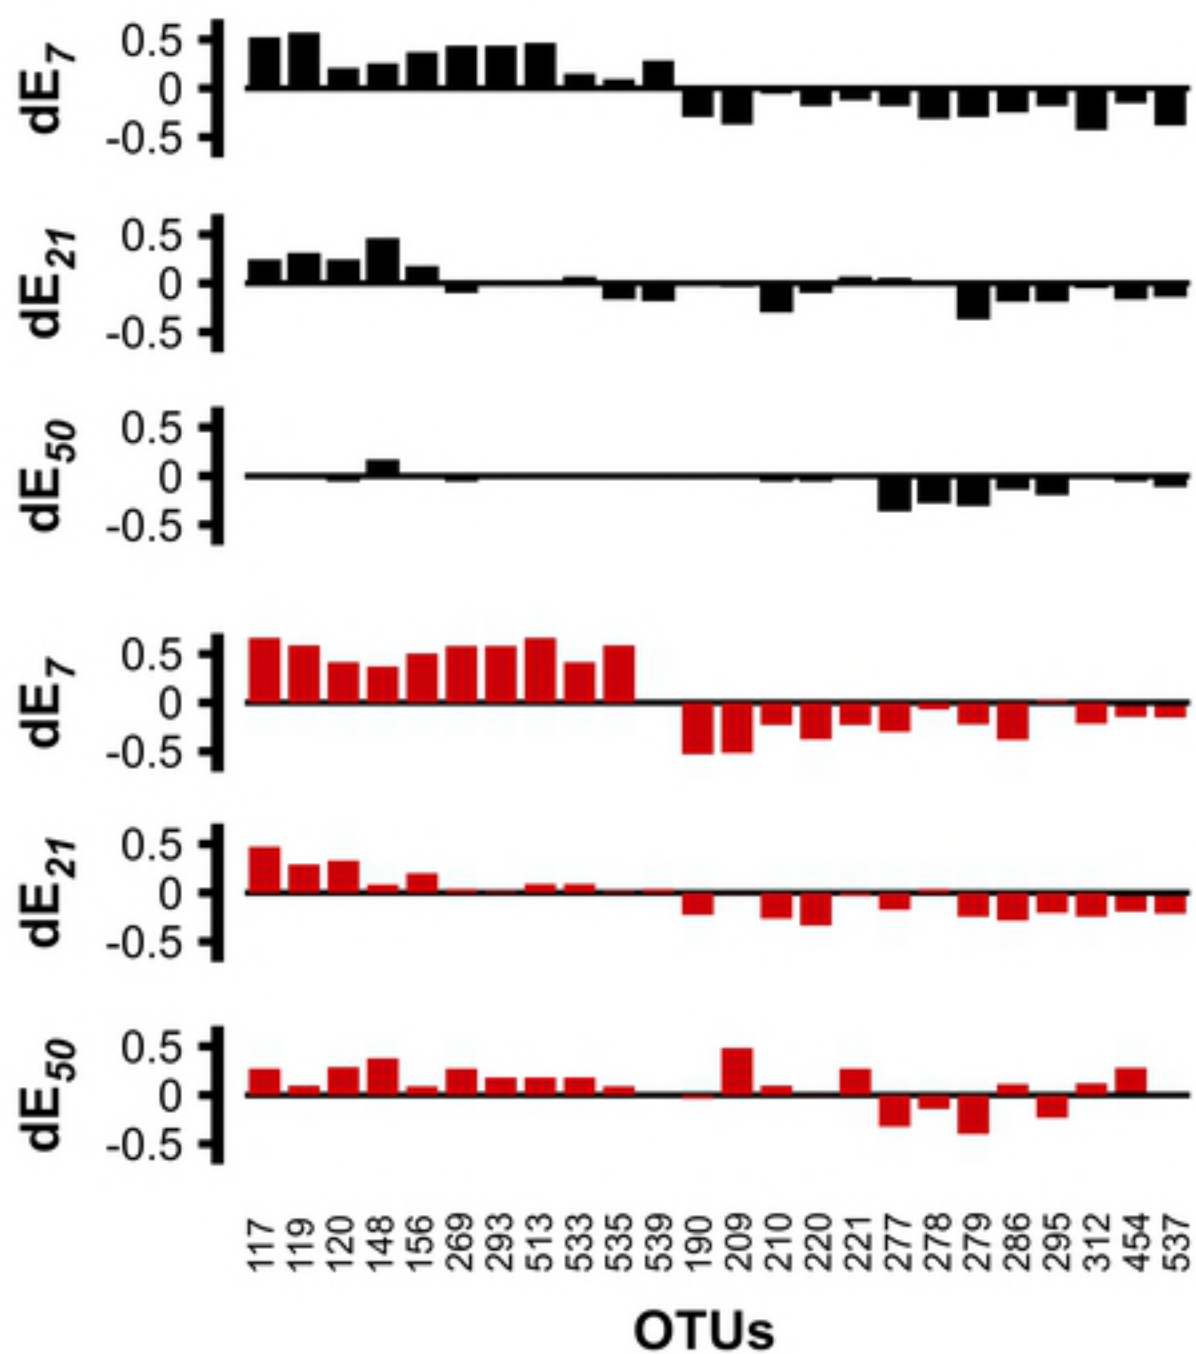**C**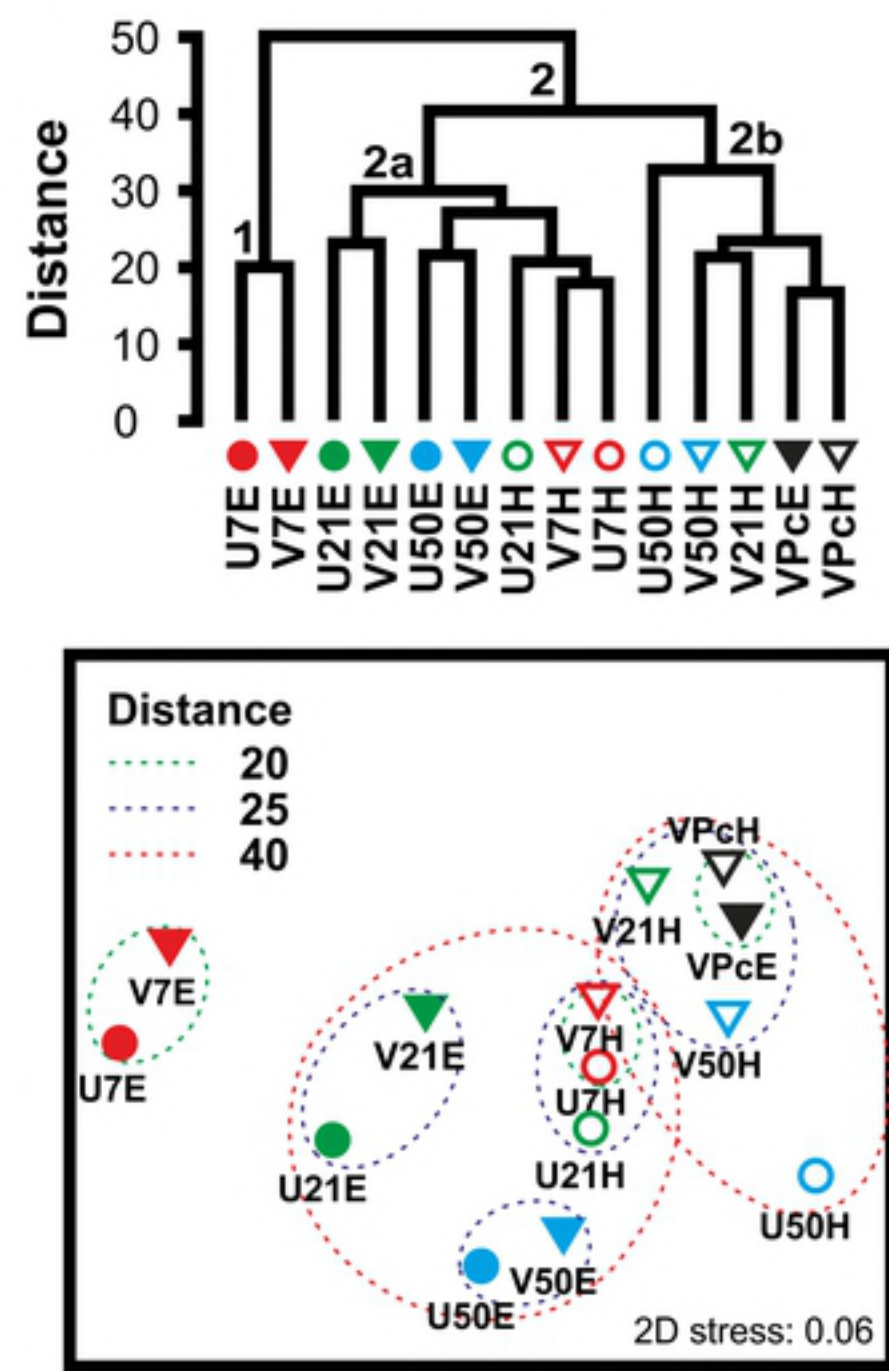

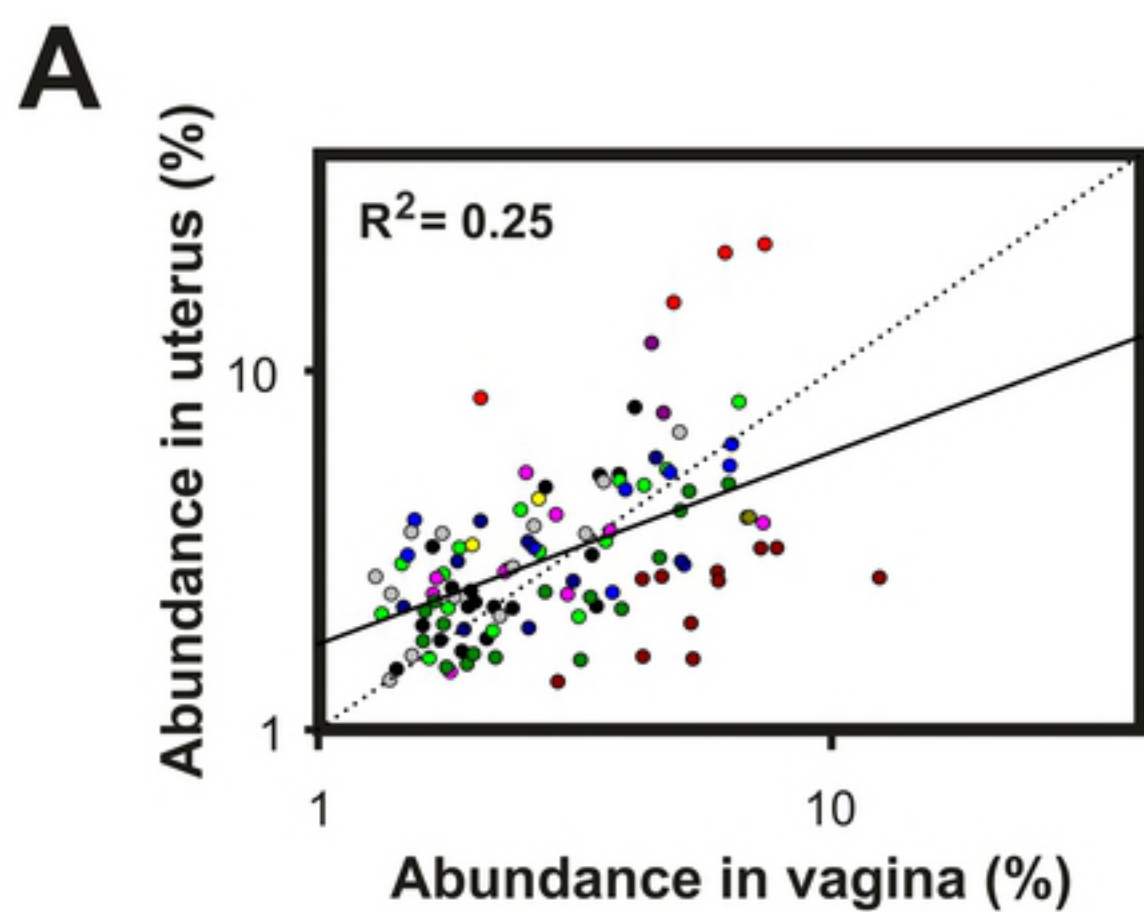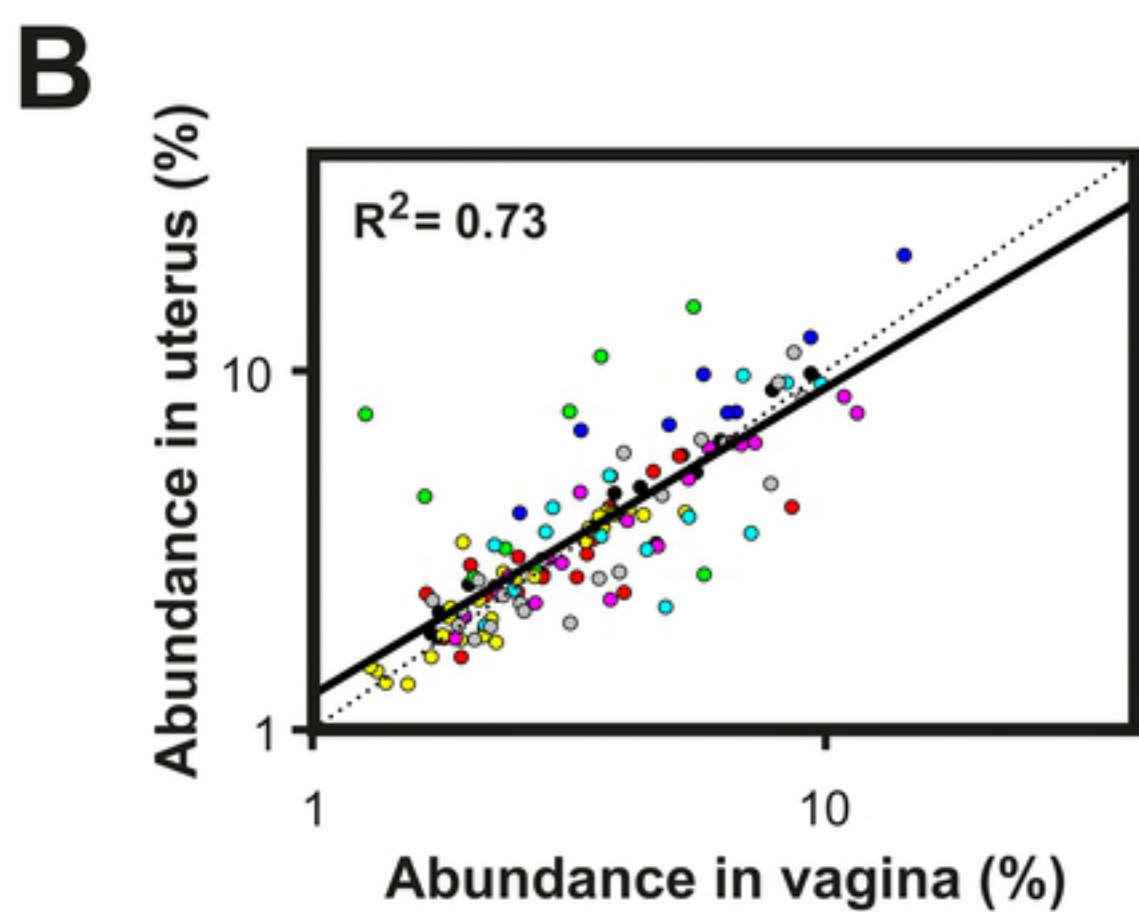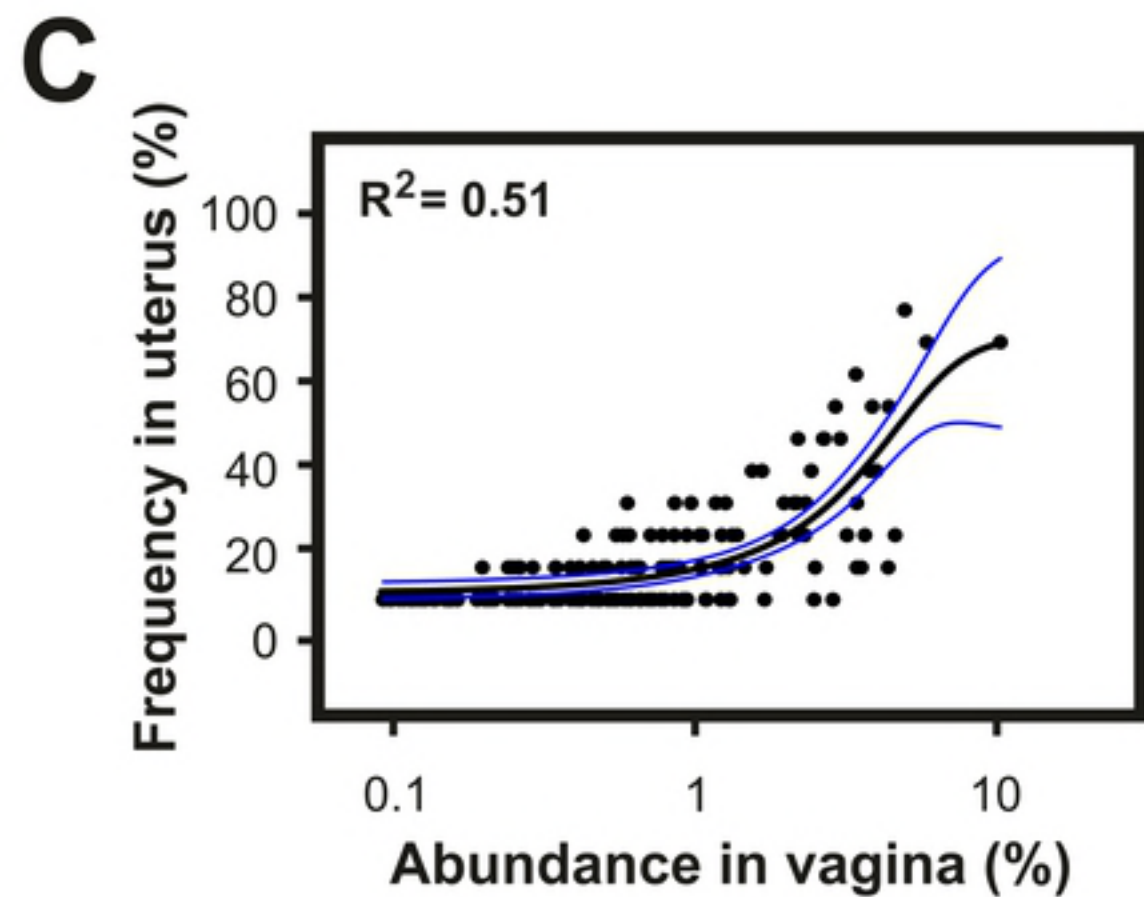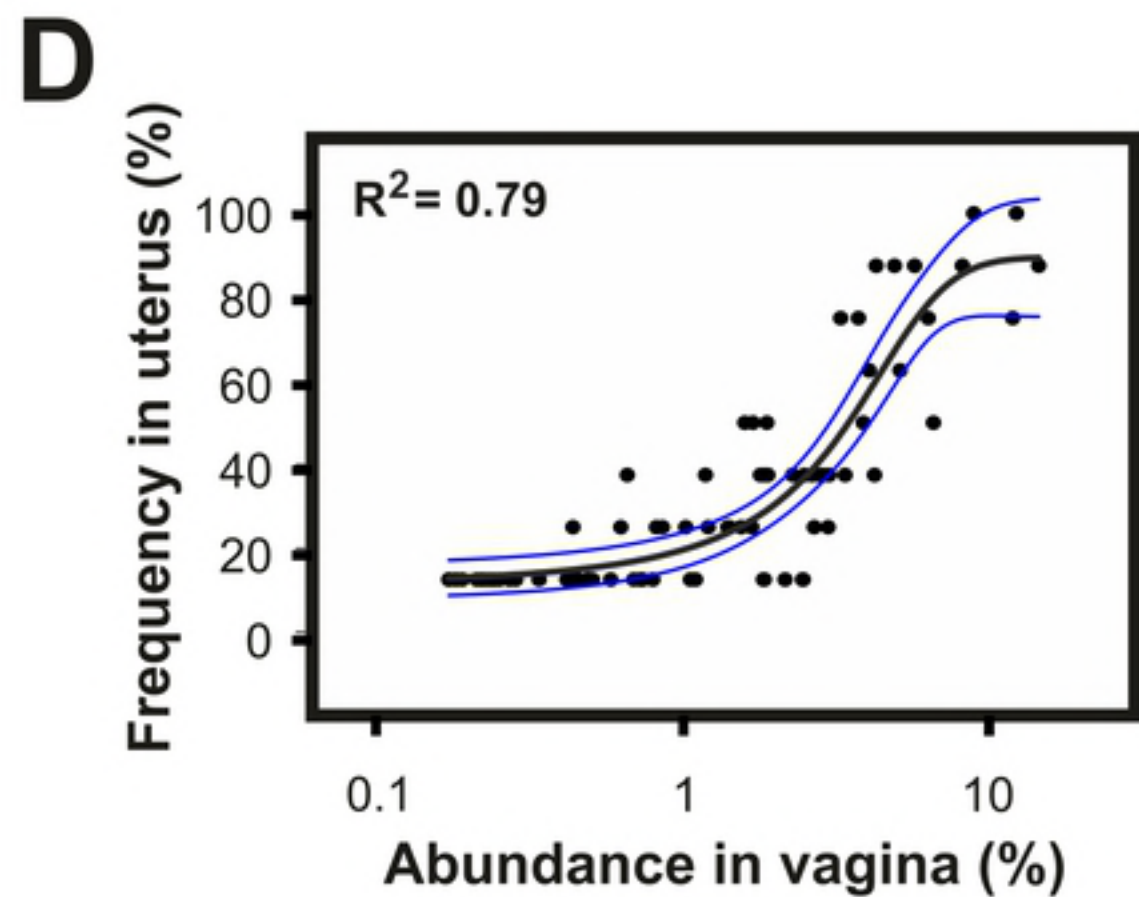

Source: https://biorxiv.org/content/biorxiv/early/2018/07/09/365346.full-text.pdf
